# Supplementary material
Source: Elsevier journal article supplement (https://comptes-rendus.academie-sciences.fr/chimie/article/10.1016/j.crci.2013.02.012/file/attach/mmc1.pdf)

# Supporting Information

**SnCl<sub>2</sub>·2H<sub>2</sub>O mediated Barbier type allylation: A comparative evaluation of catalytic performance of CuI and Pd(OAc)<sub>2</sub>**

**Pabitra Kumar Kalita and Prodeep Phukan**

Department of Chemistry, Gauhati University, Guwahati-781014, Assam, India

E-mail: pphukan@yahoo.com

**Copies of <sup>1</sup>H and <sup>13</sup>C NMR Spectra of compounds**

# 1-Phenyl-but-3-en-1-ol (3a)

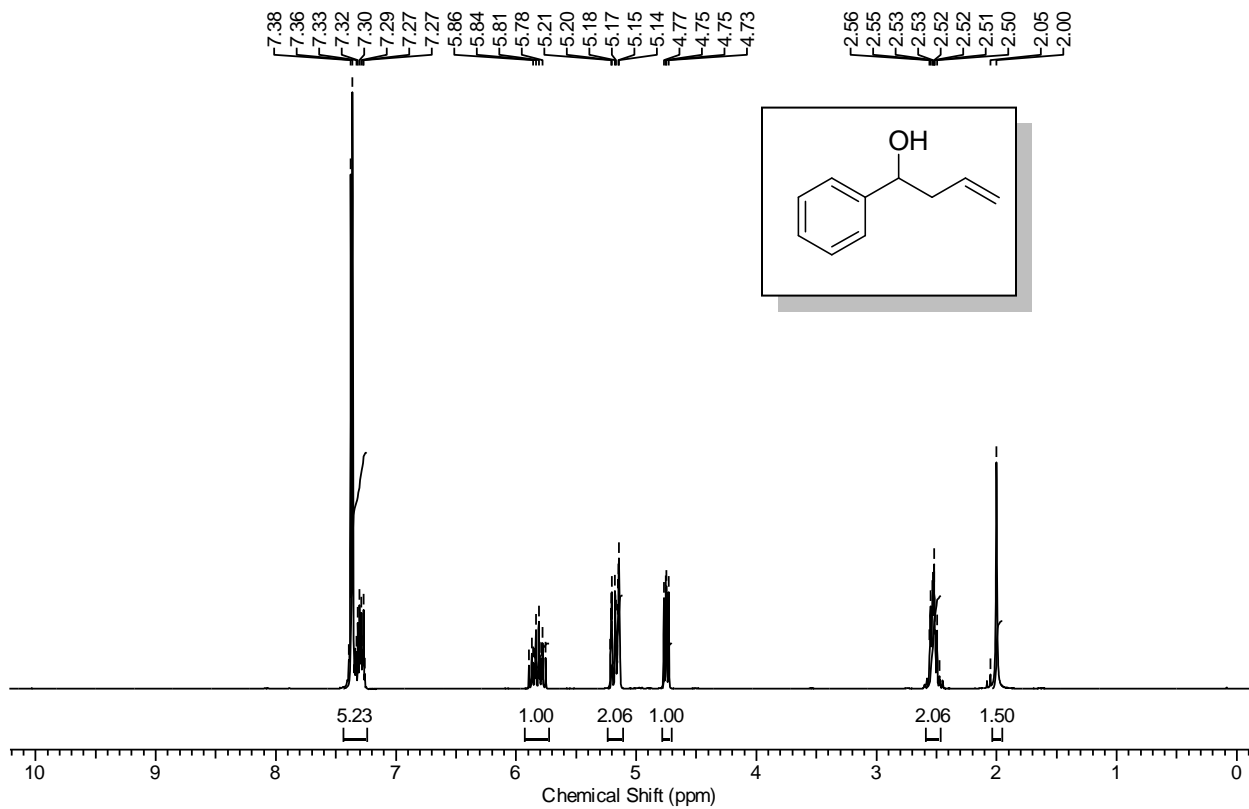

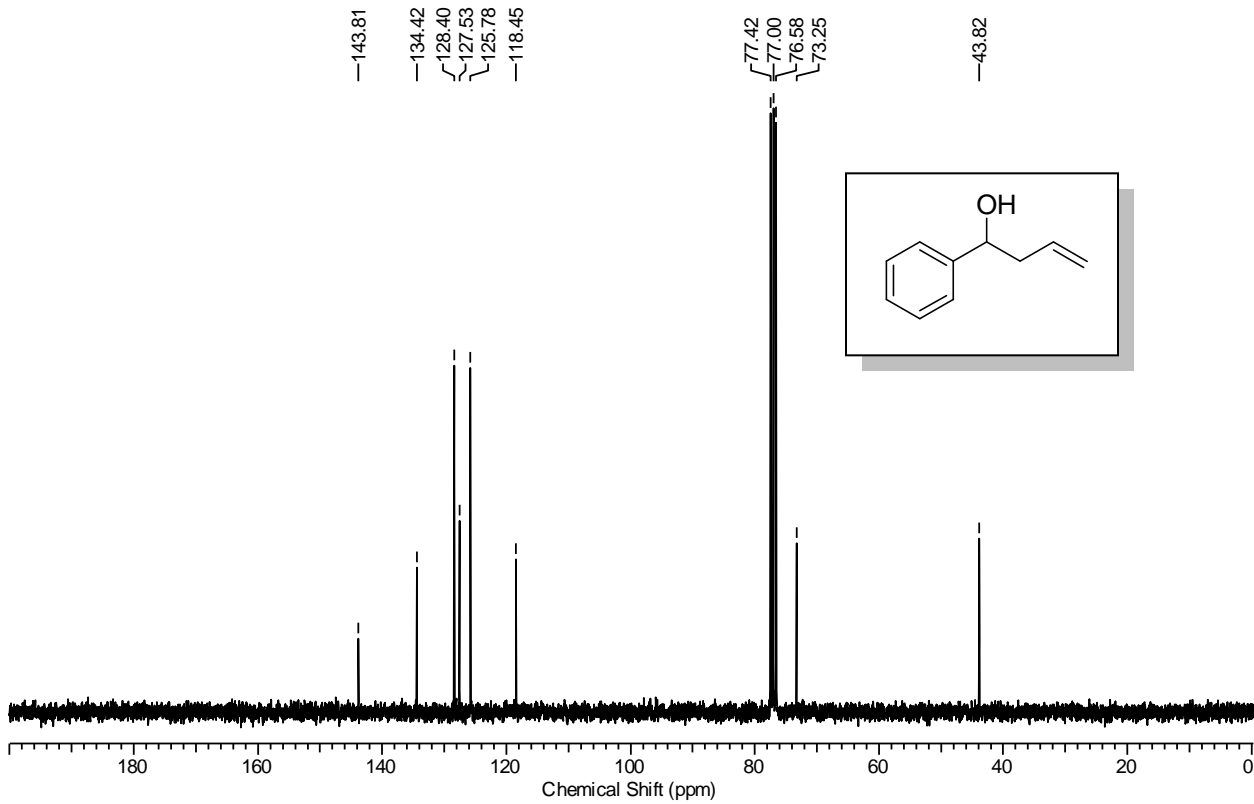

# 1-(3-Chlorophenyl)but-3-en-1-ol (3b)

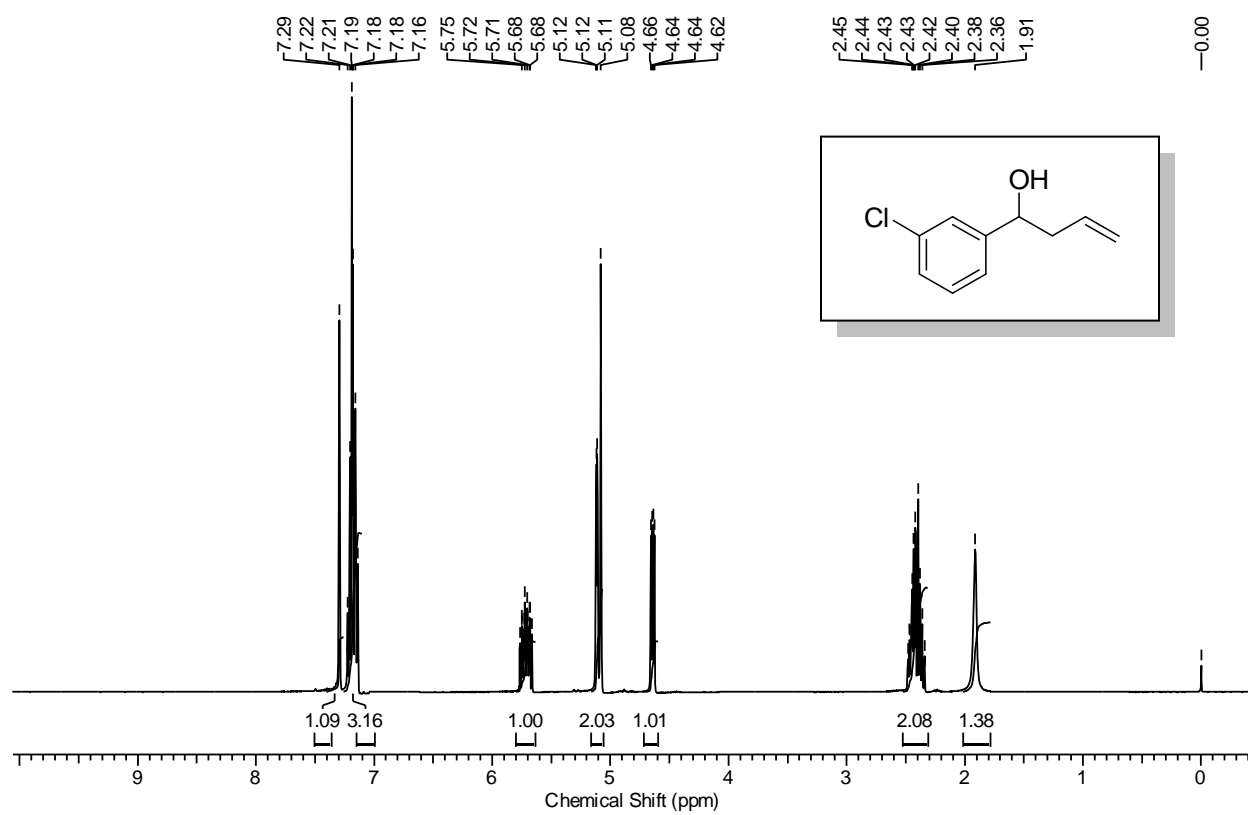

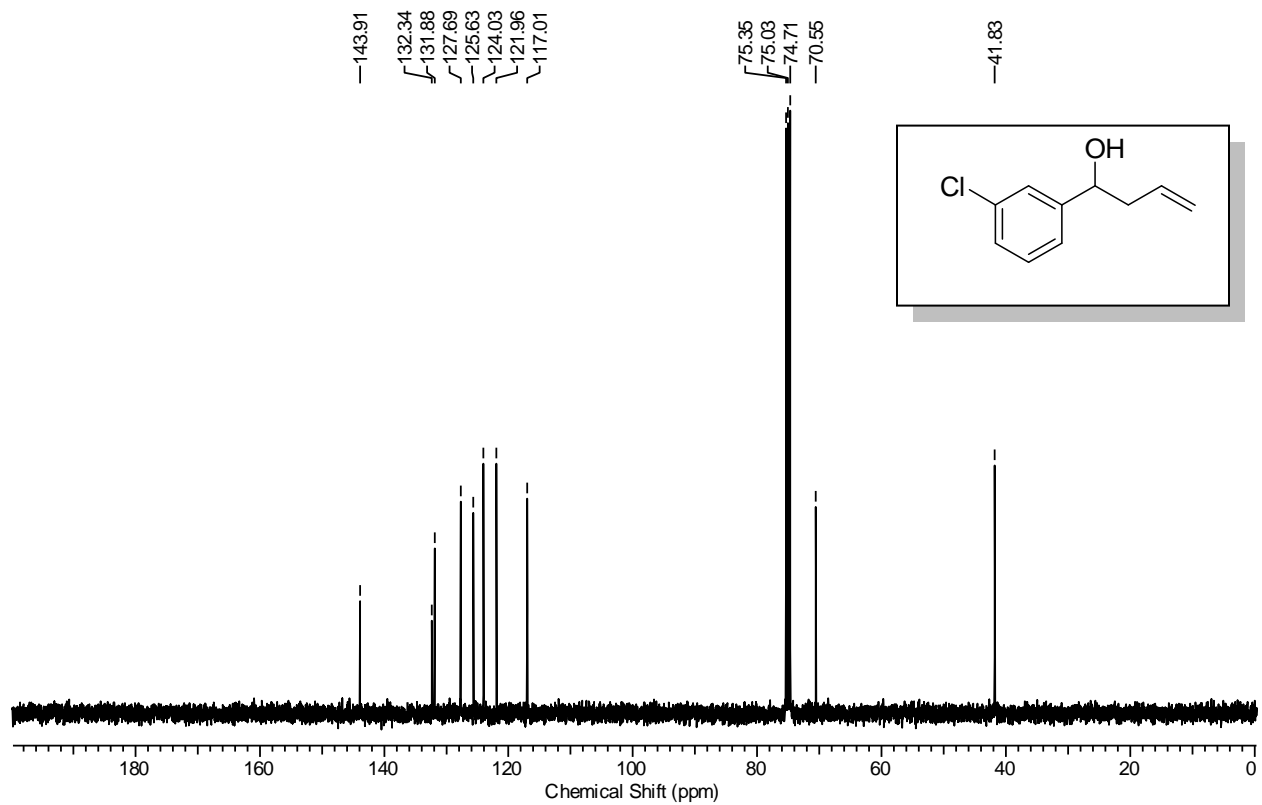

# 1-(2-Chlorophenyl)but-3-en-1-ol (3c)

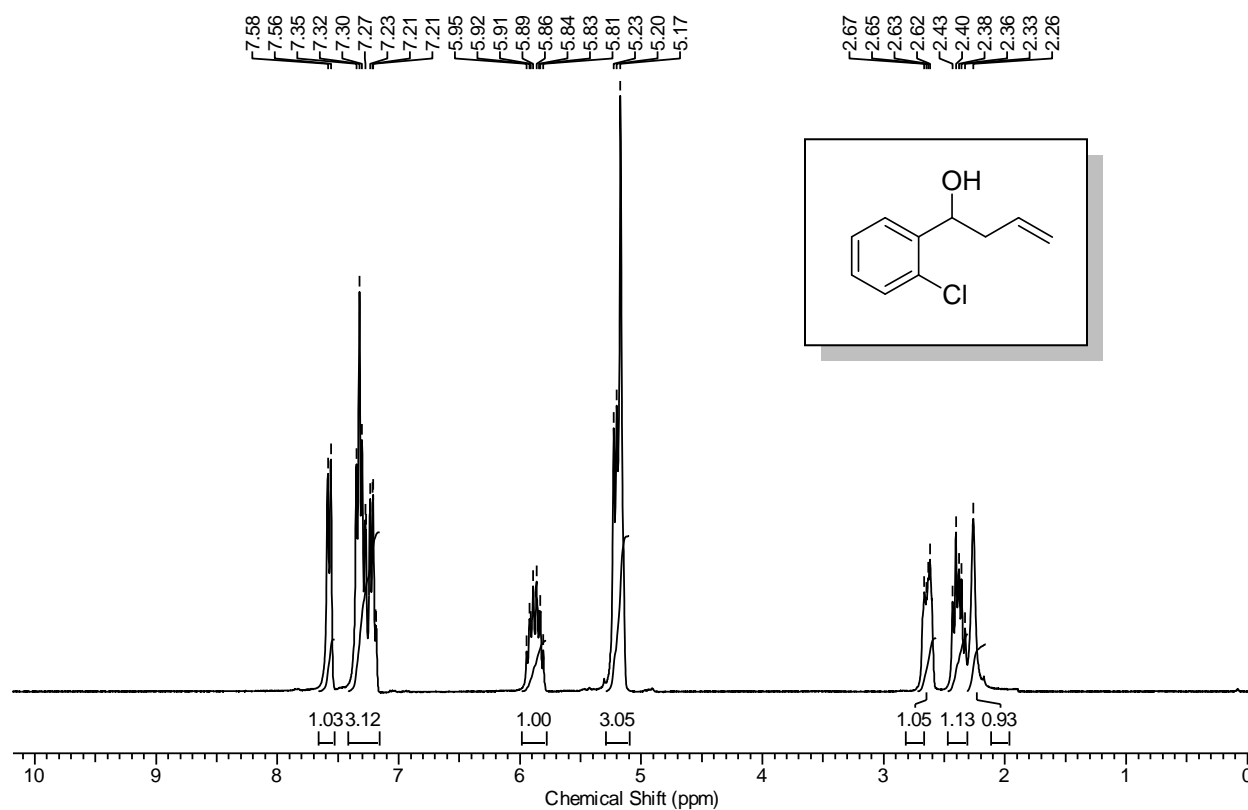

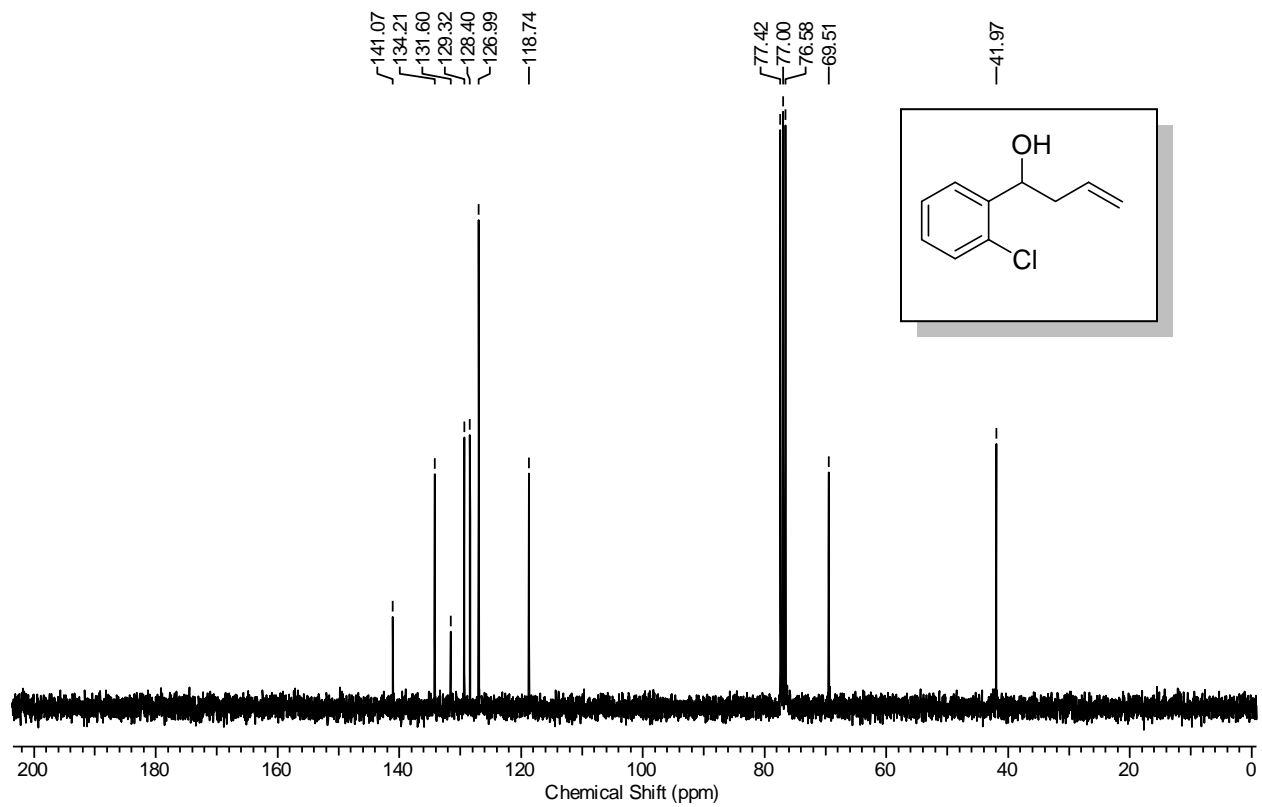

### 1-(4-Chlorophenyl)but3-en-1-ol (3d)

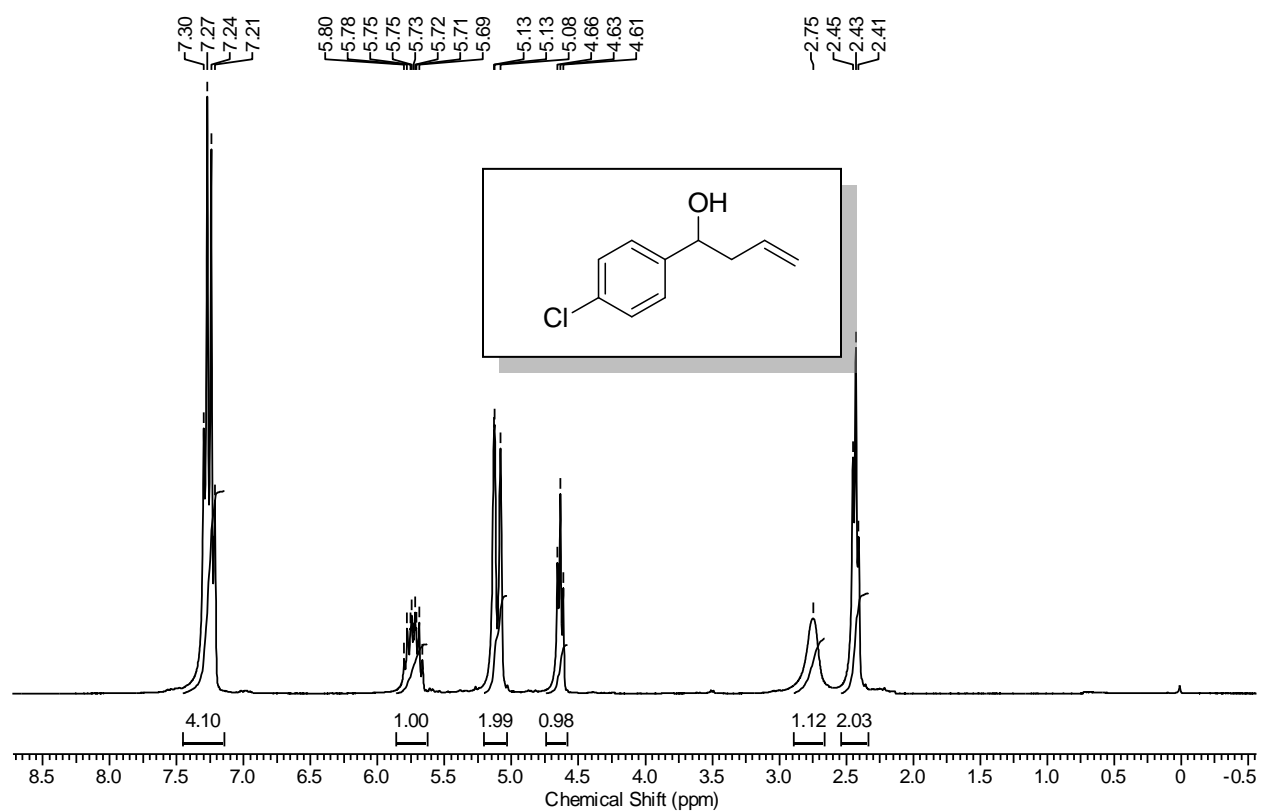



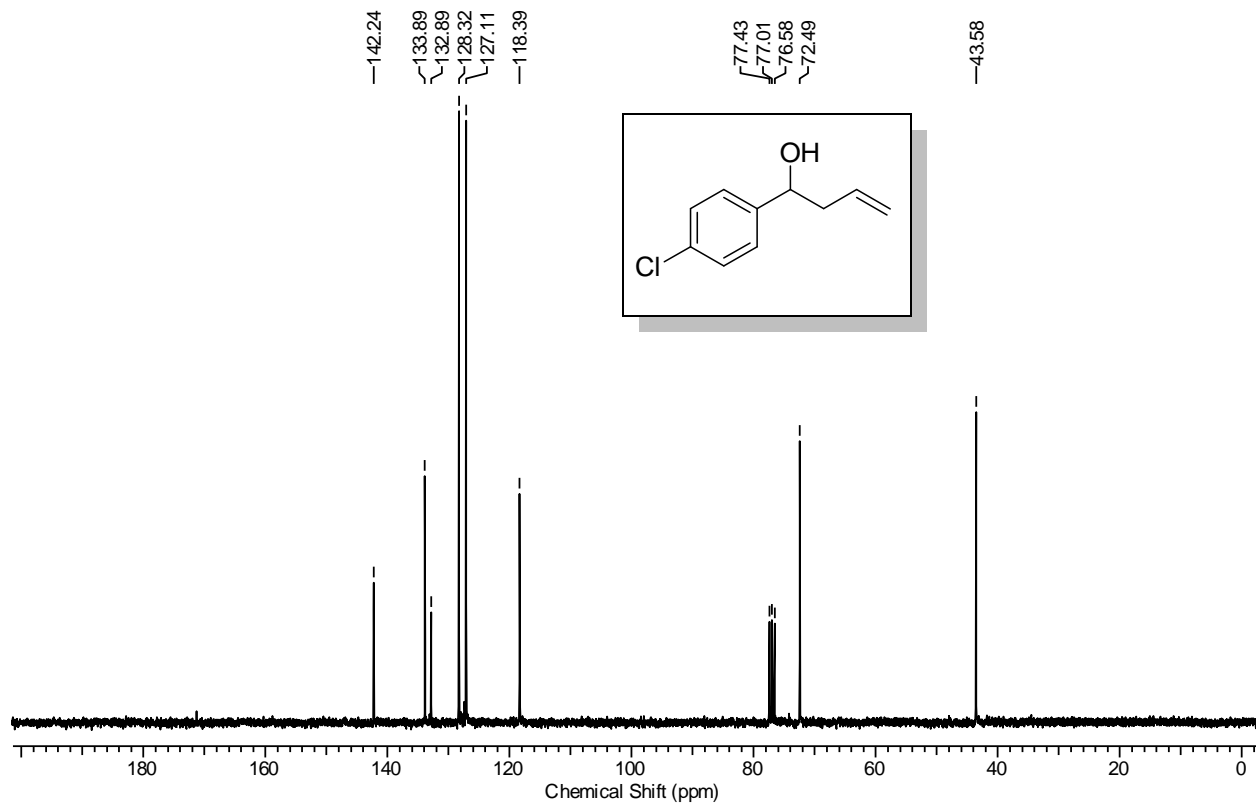

### 1-(4-Methoxyphenyl)but-3-en-1-ol (3e)

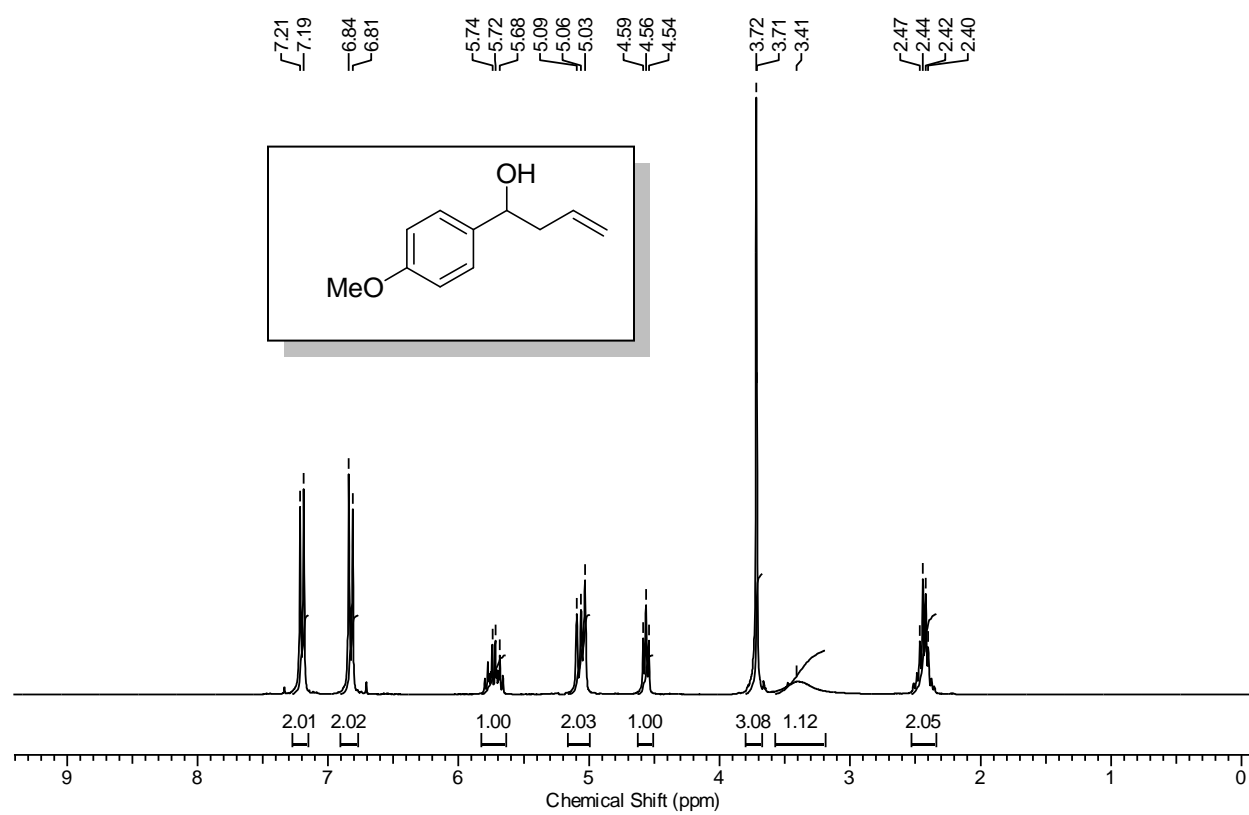

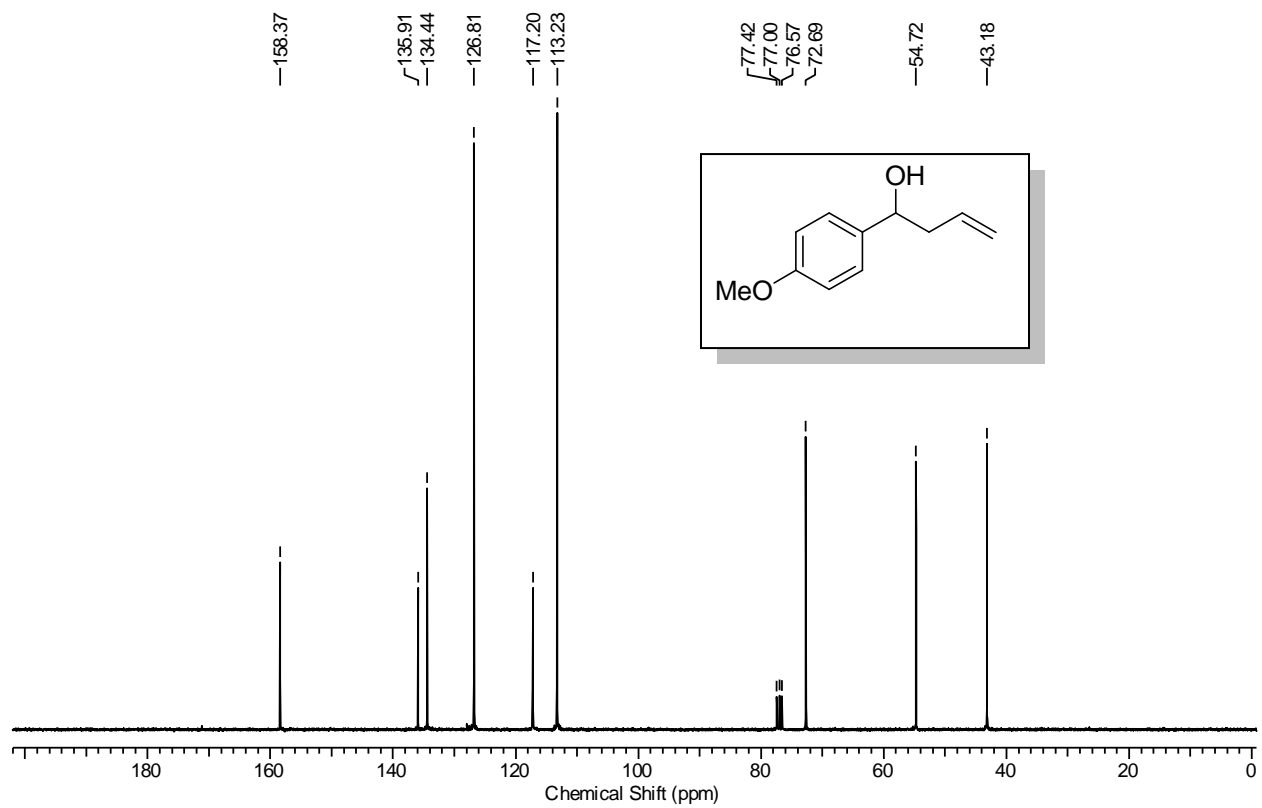

# 1-(2-Methoxyphenyl)but-3-en-1-ol (3f)

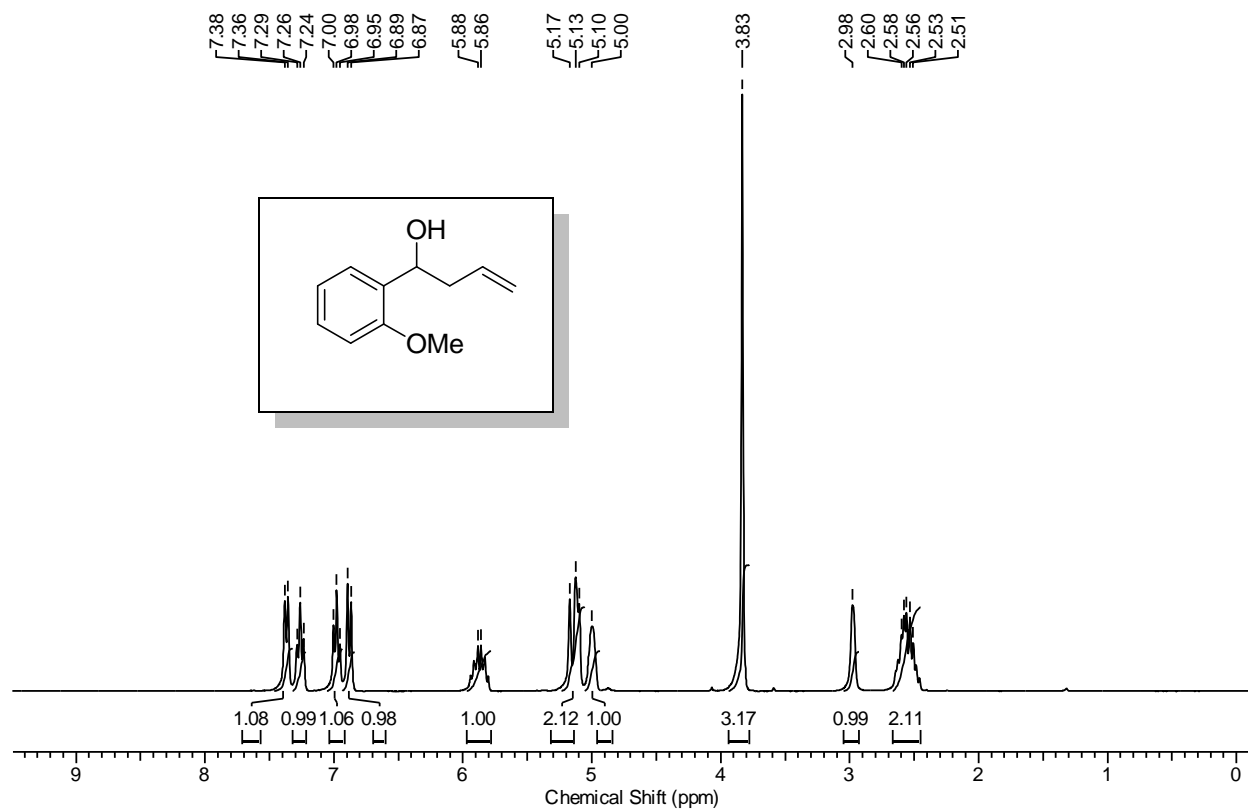

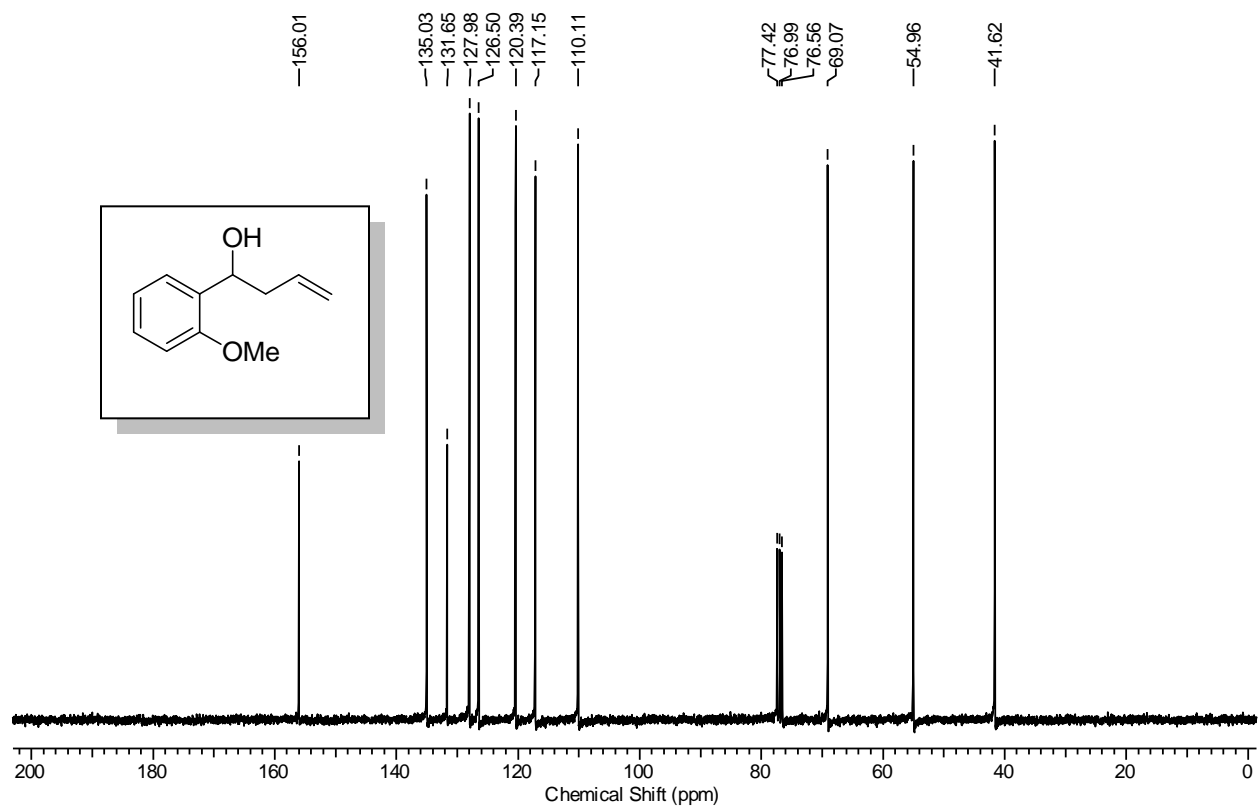

# 1-(4-Bromophenyl)but-3-en-1-ol (3g)

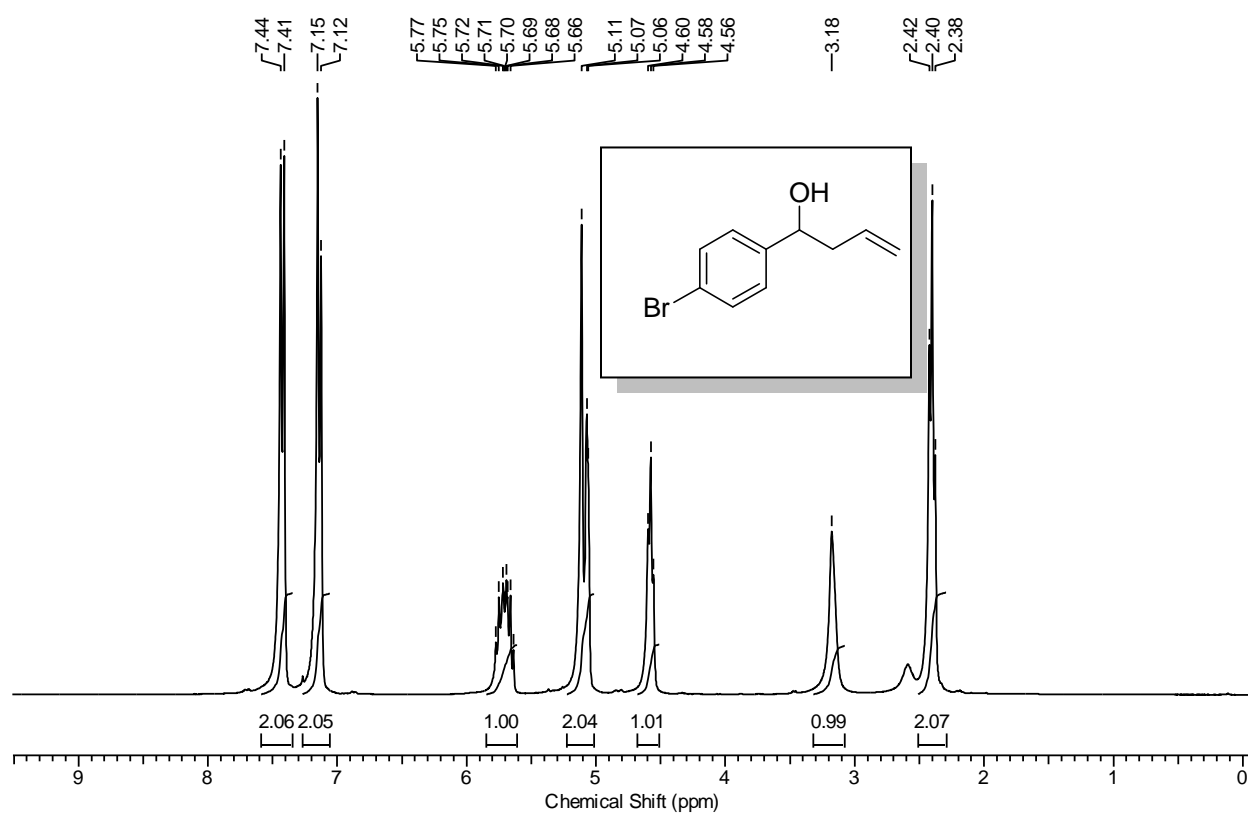

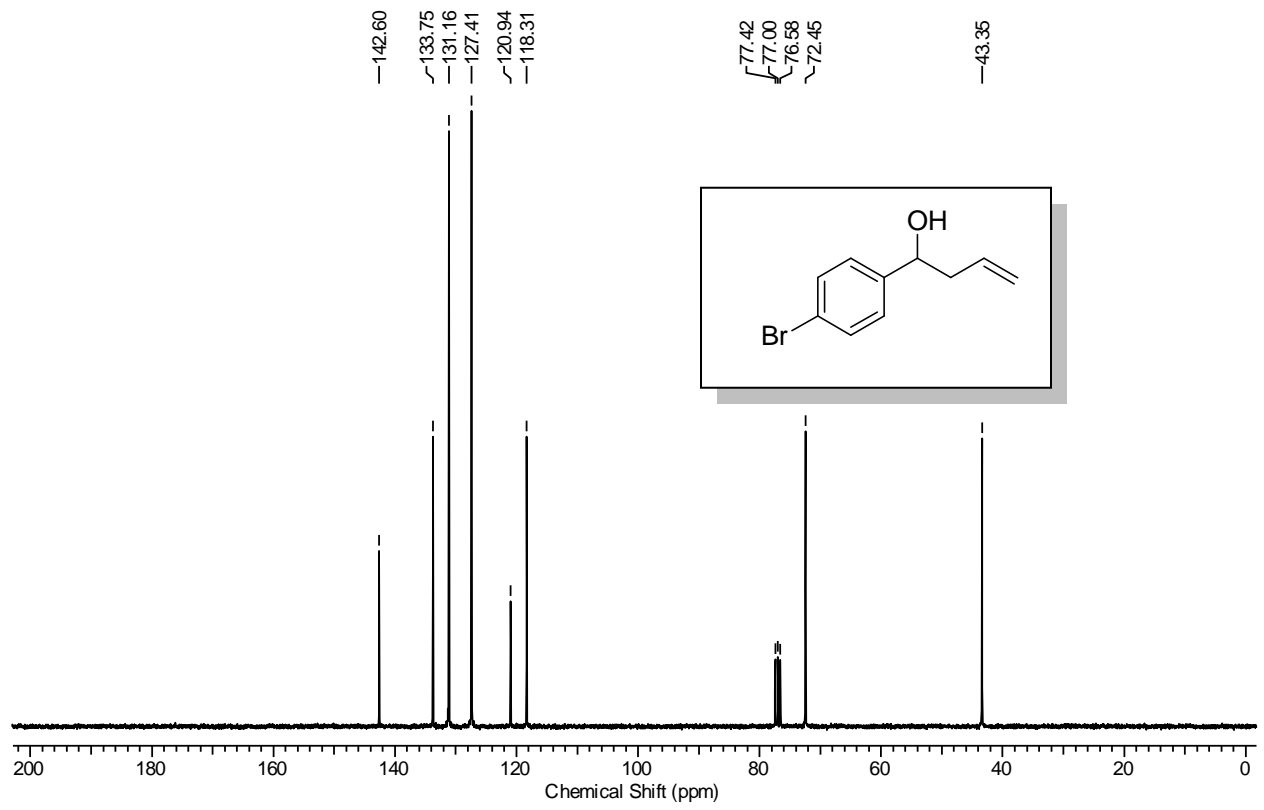

# 1-(4-Nitrophenyl)but-3-en-1-ol (3h)

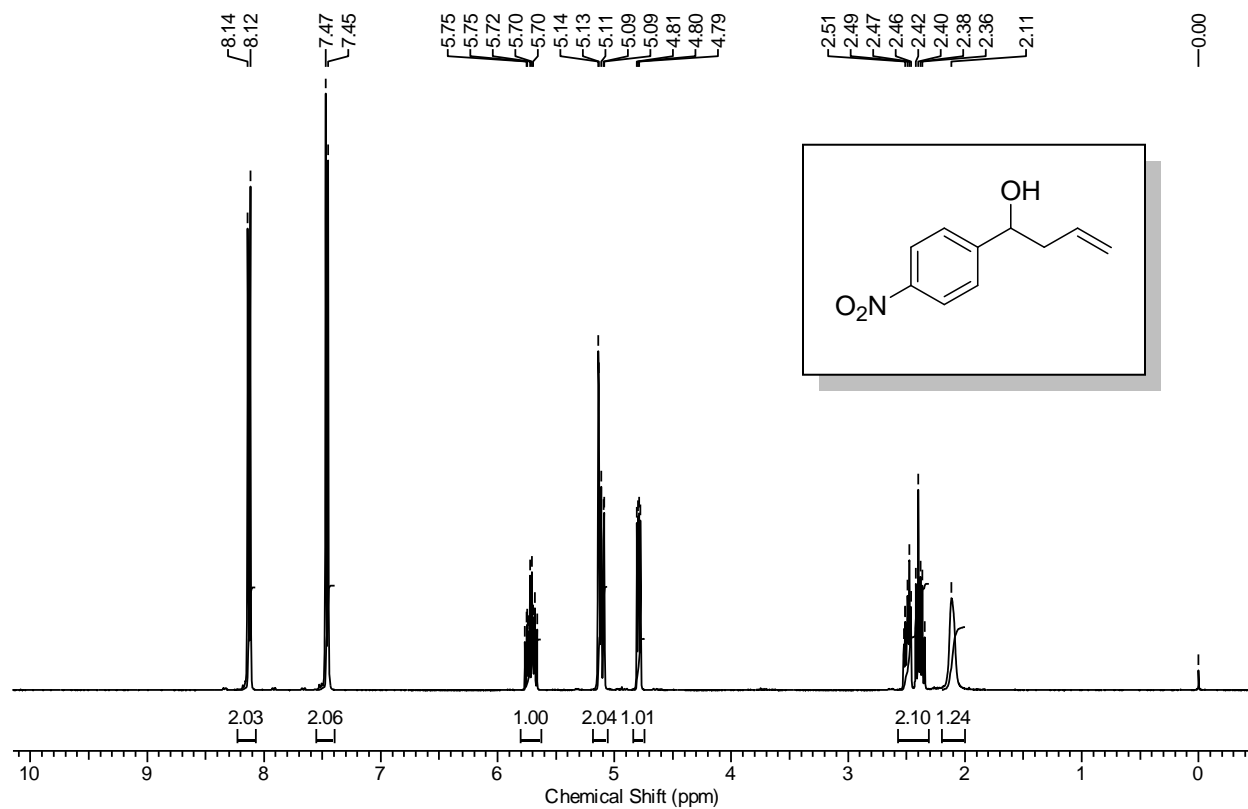



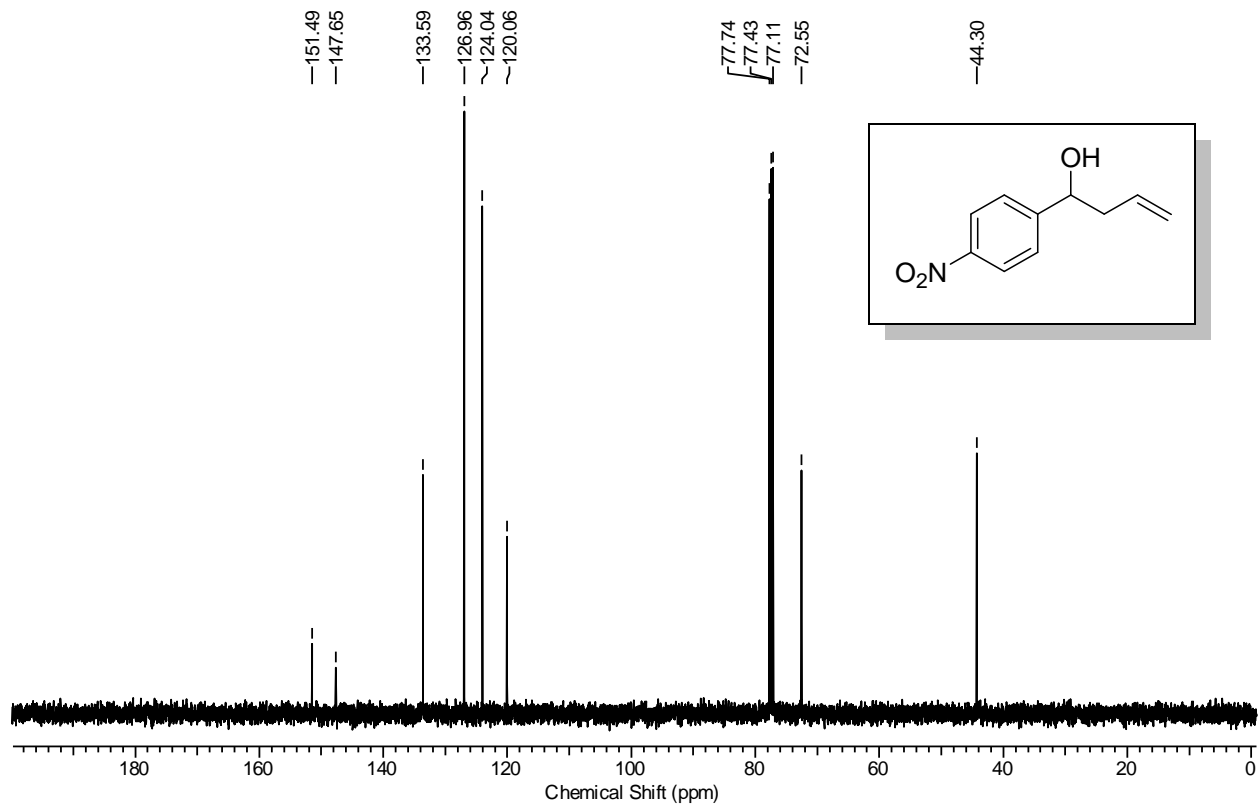

### 1-(2-Nitrophenyl)but-3-en-1-ol (3i)

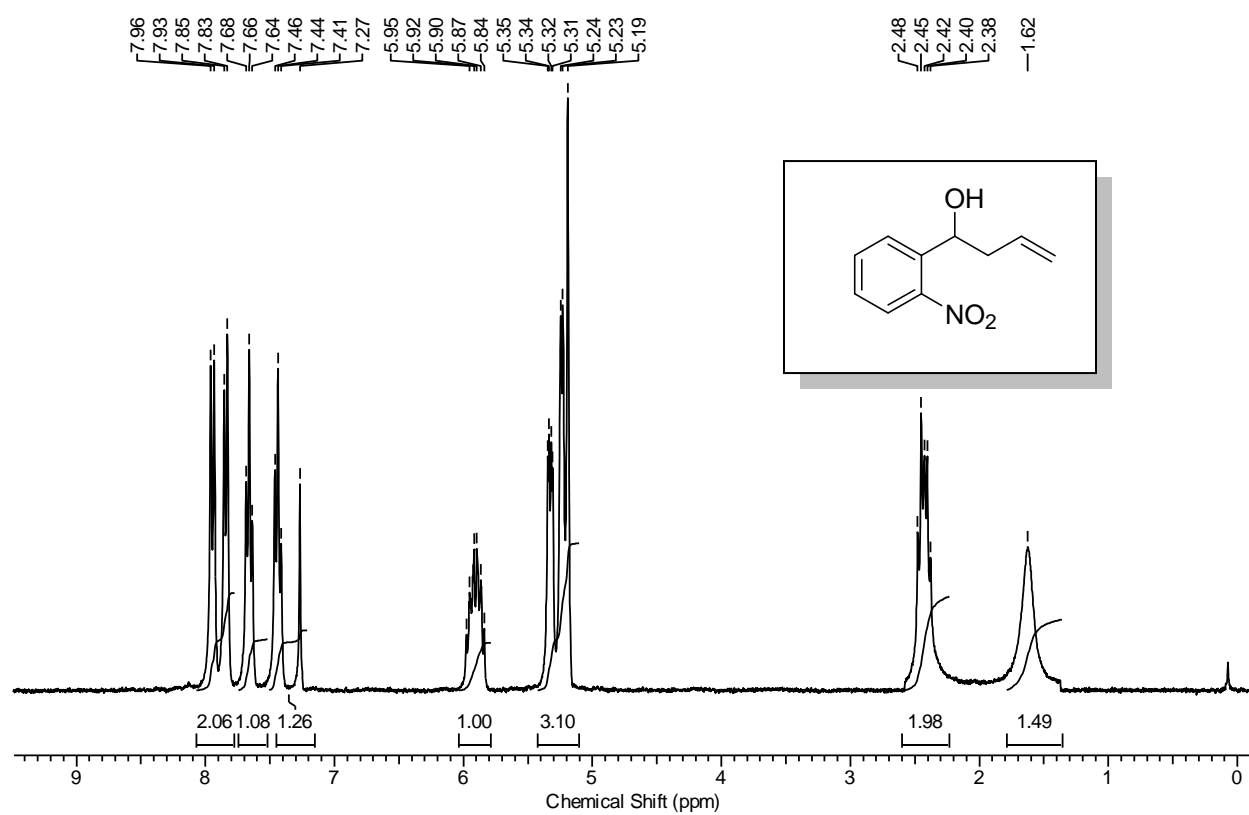

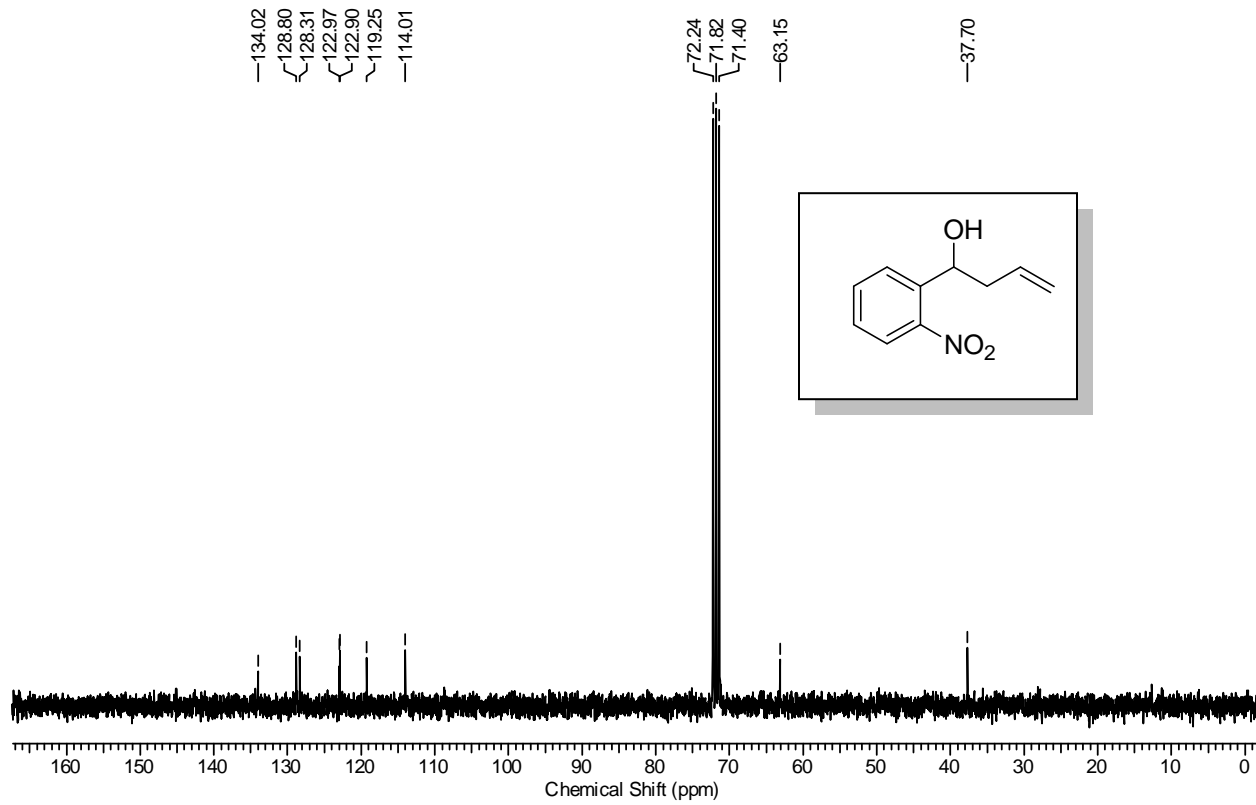

134.02  
128.80  
128.31  
122.97  
122.90  
119.25  
114.01

72.24  
71.82  
71.40  
63.15

37.70

Chemical Shift (ppm)

# 1-(4-Methylphenyl)but-3-en-1-ol(3j)

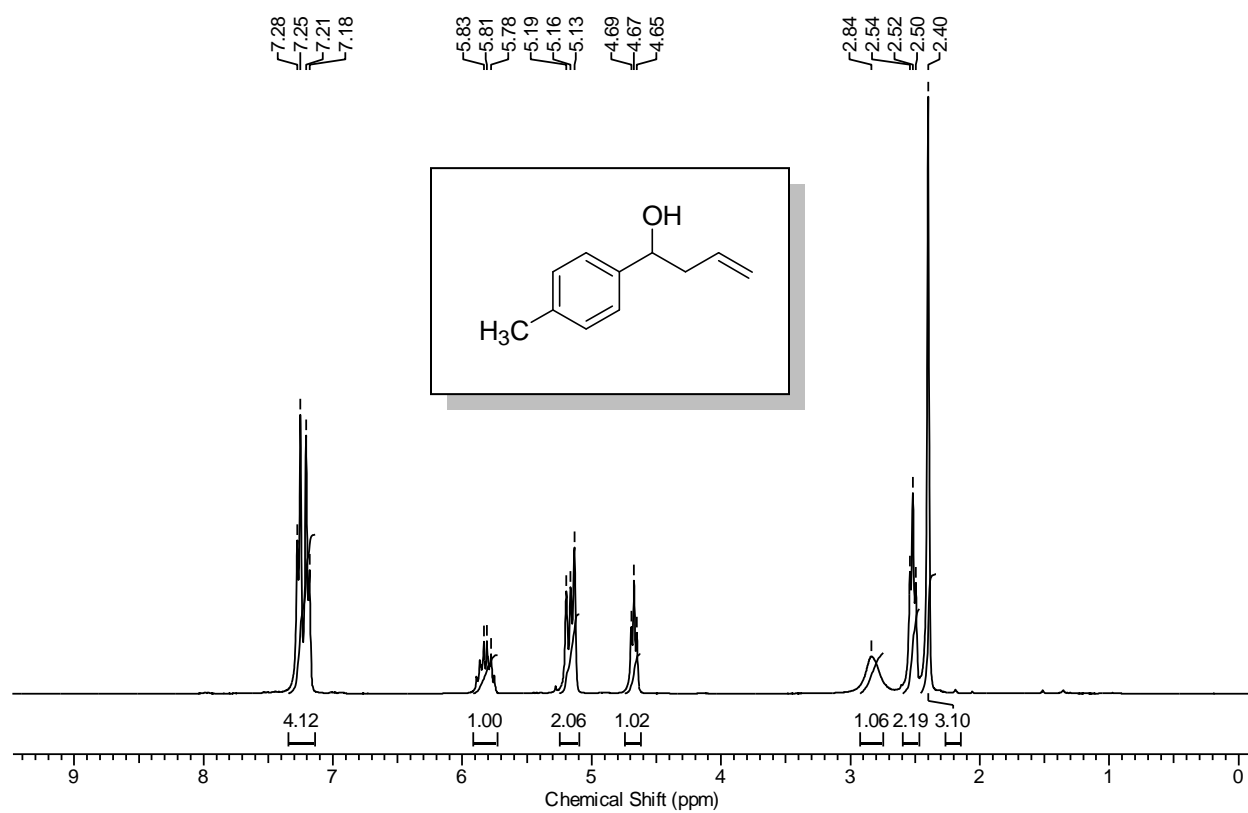

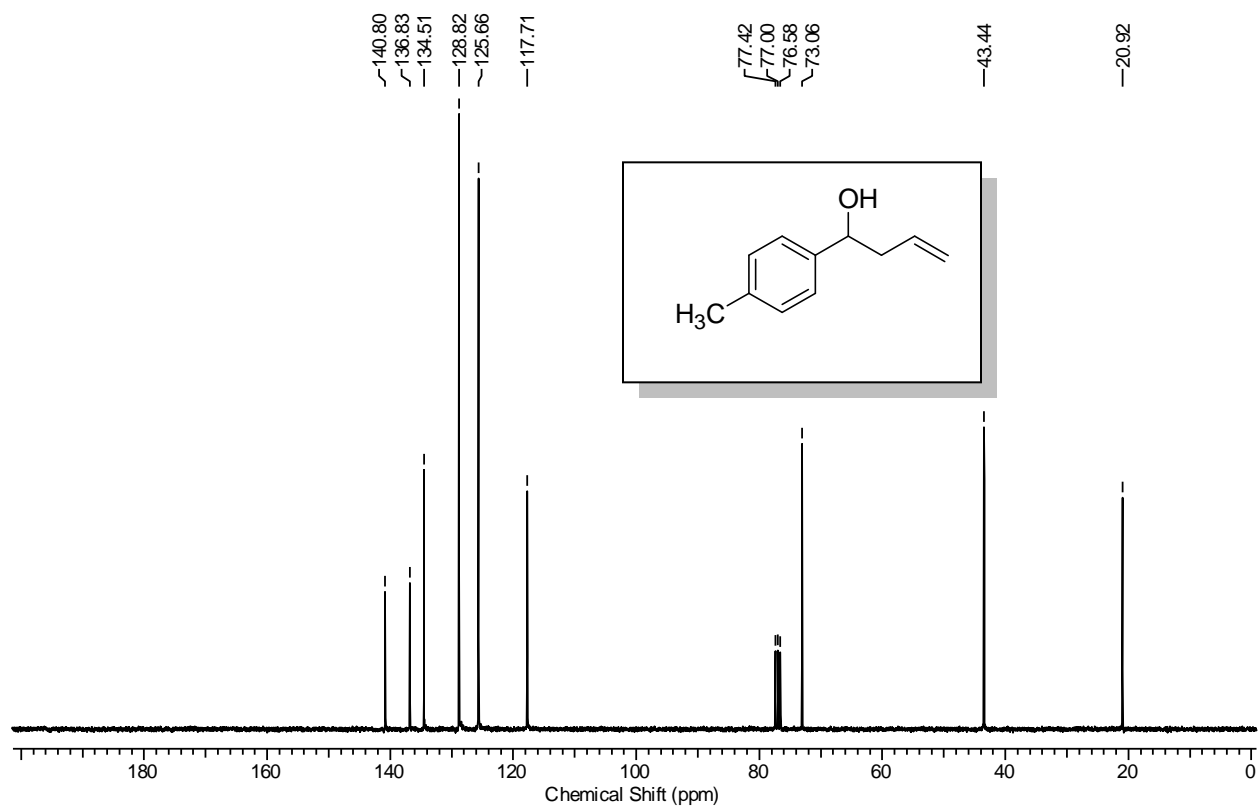

# 1-(4-Fluorophenyl)but-3-en-1-ol (3k)

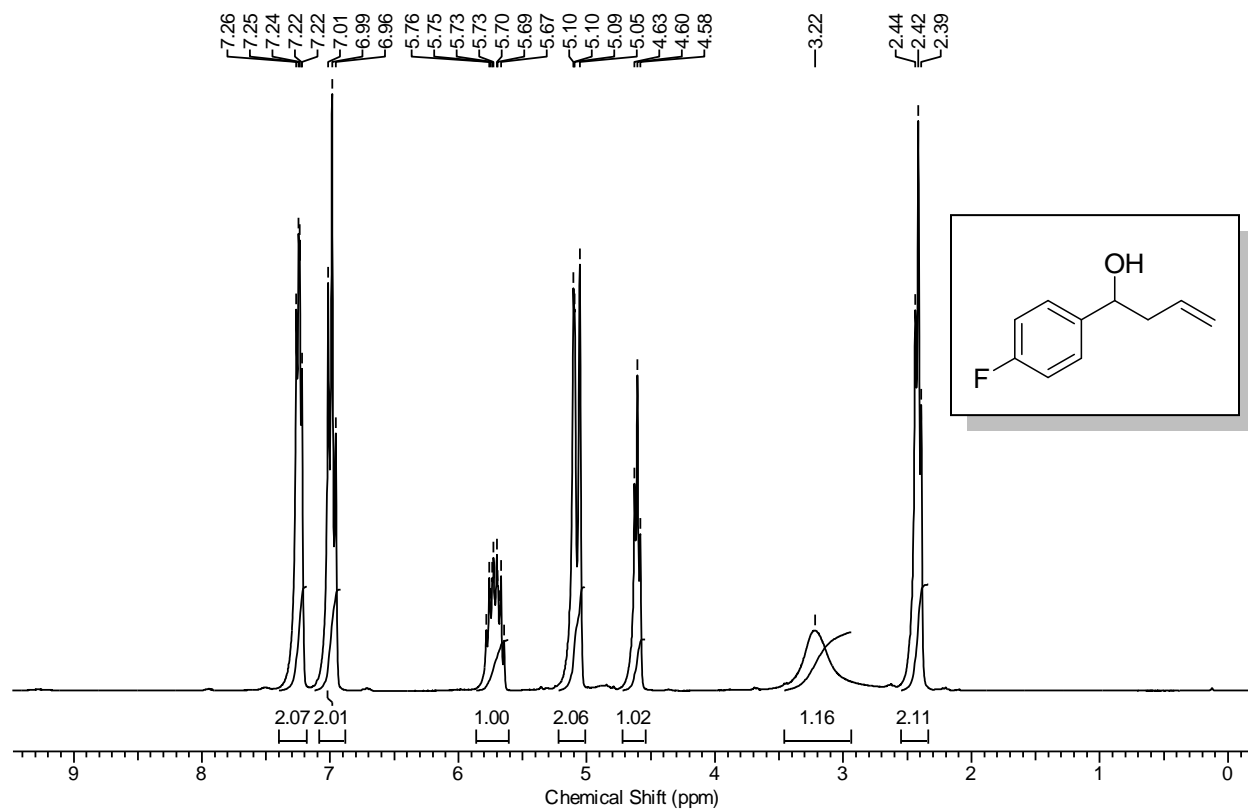

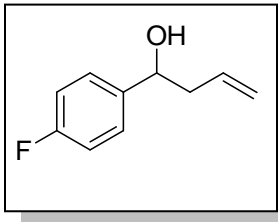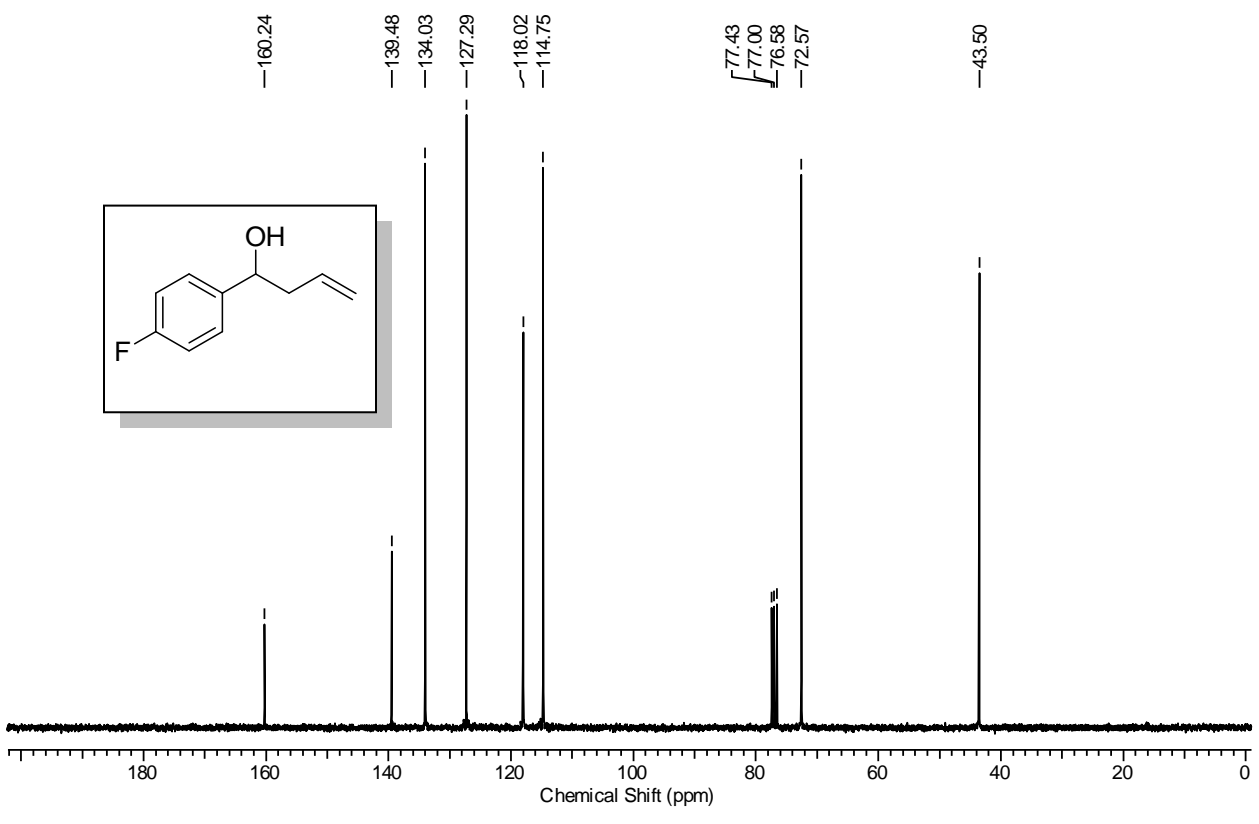

# 1-(2,4-Dichlorophenyl)but-3-en-1-ol (3I)

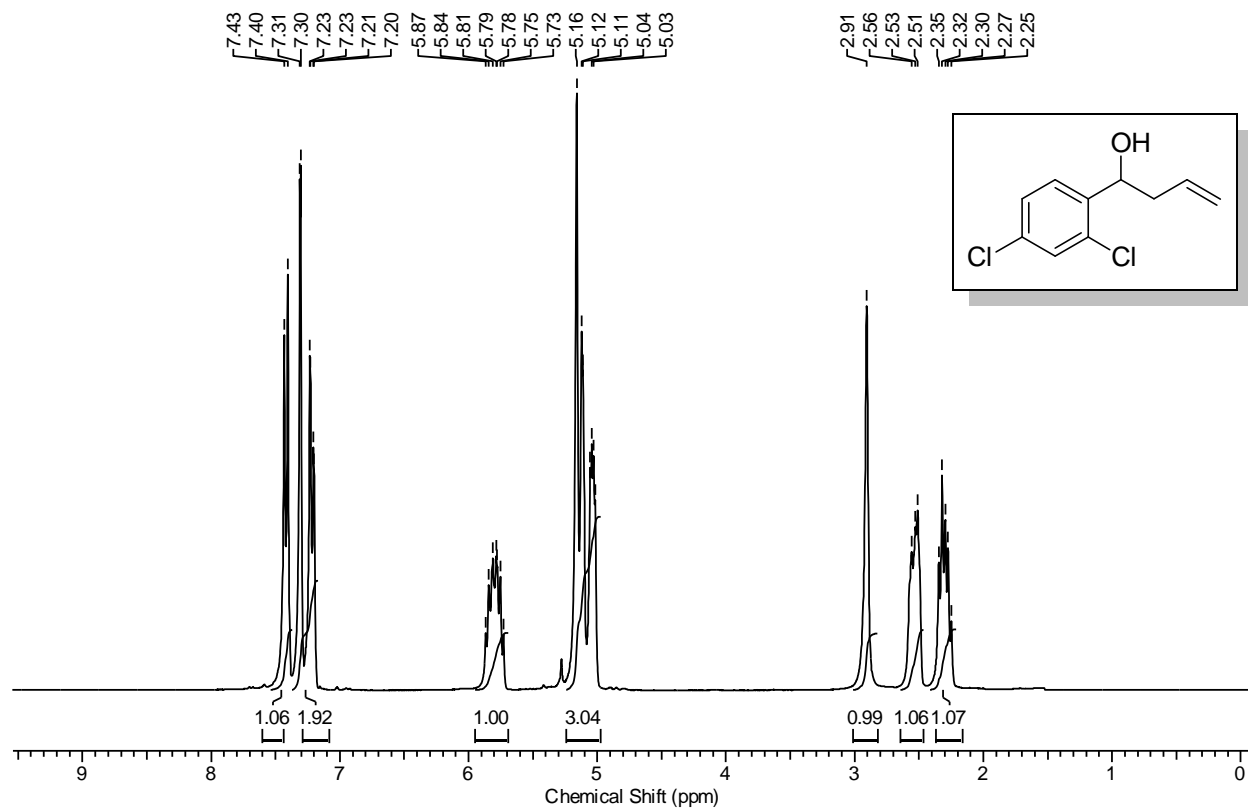



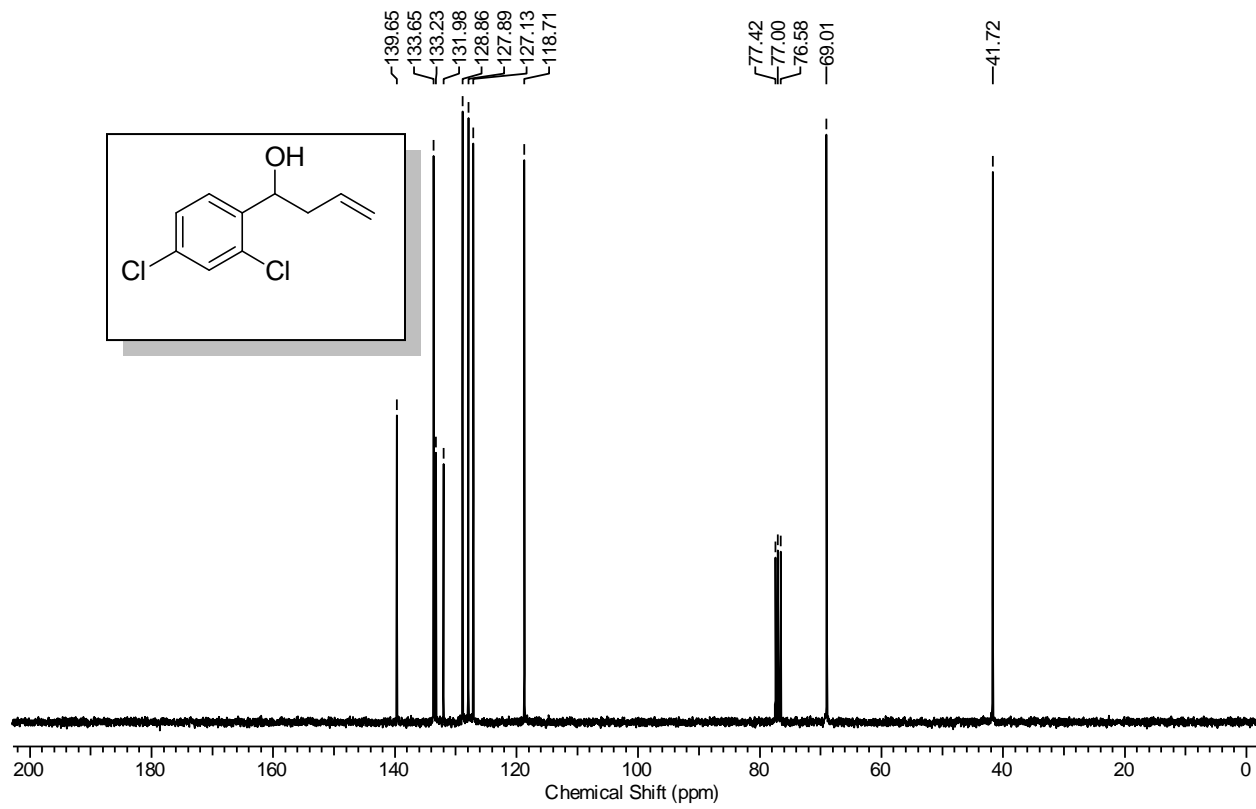

# 1-(4-Ethylphenyl)but-3-en-1-ol (3m)

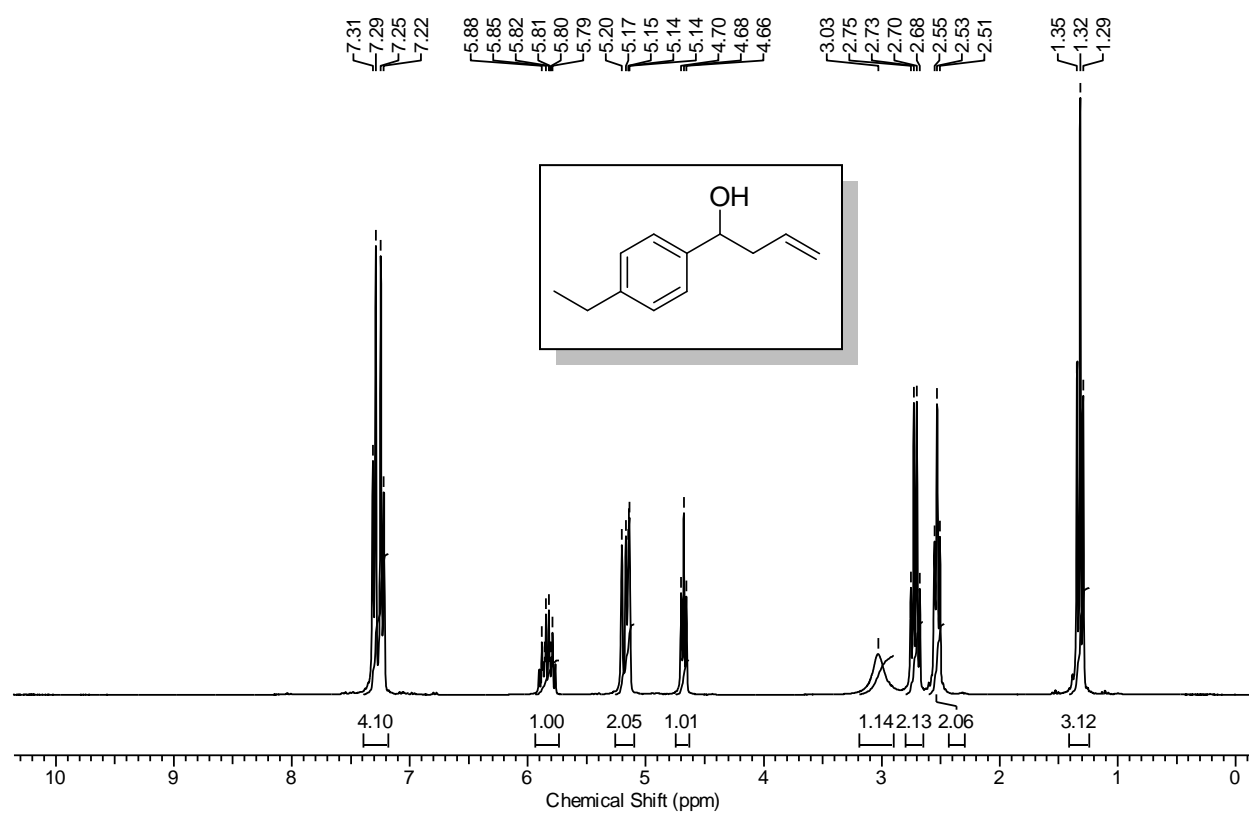

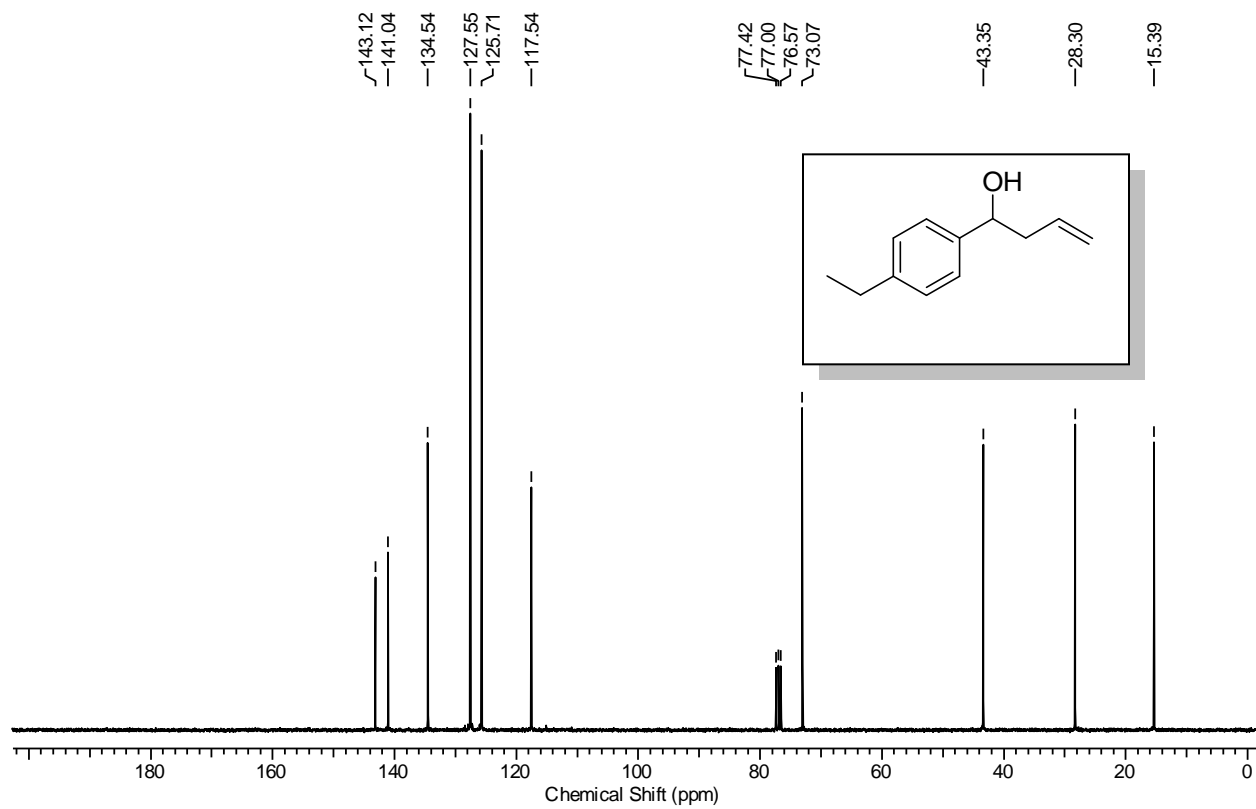

# 1-(3,4-Dimethoxyphenyl)but-3-en-1-ol (3n)

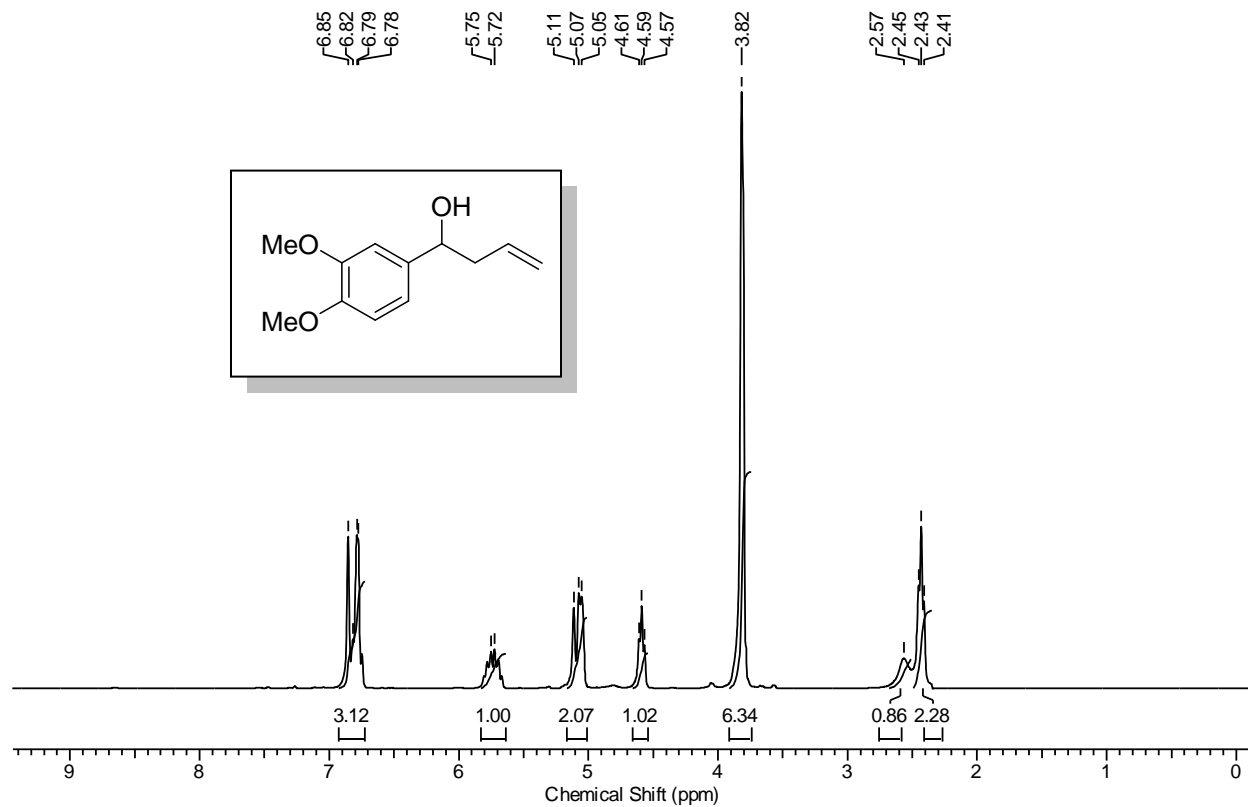

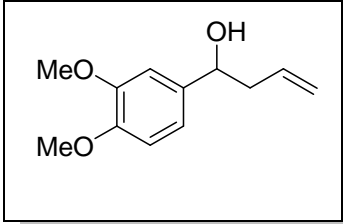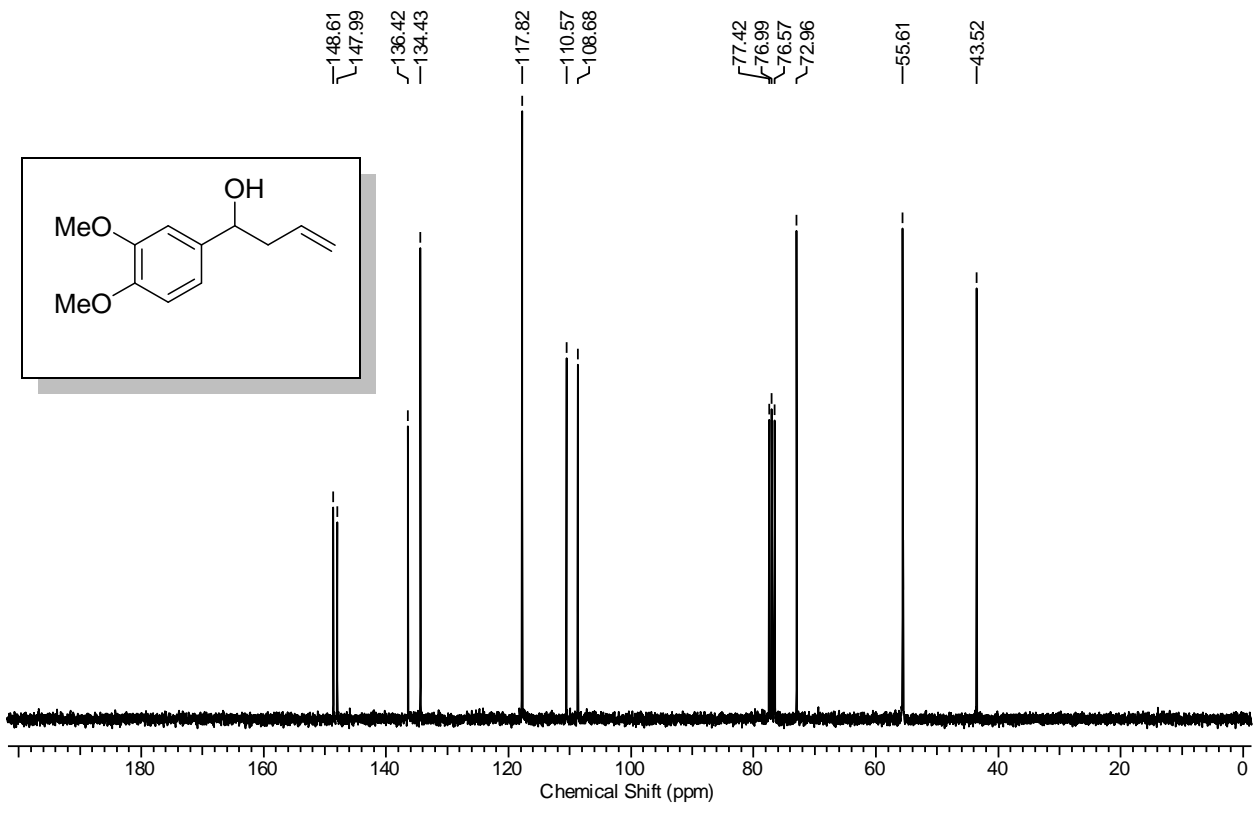

### 1-(2-Bromophenyl)but-3-en-1-ol (3o)

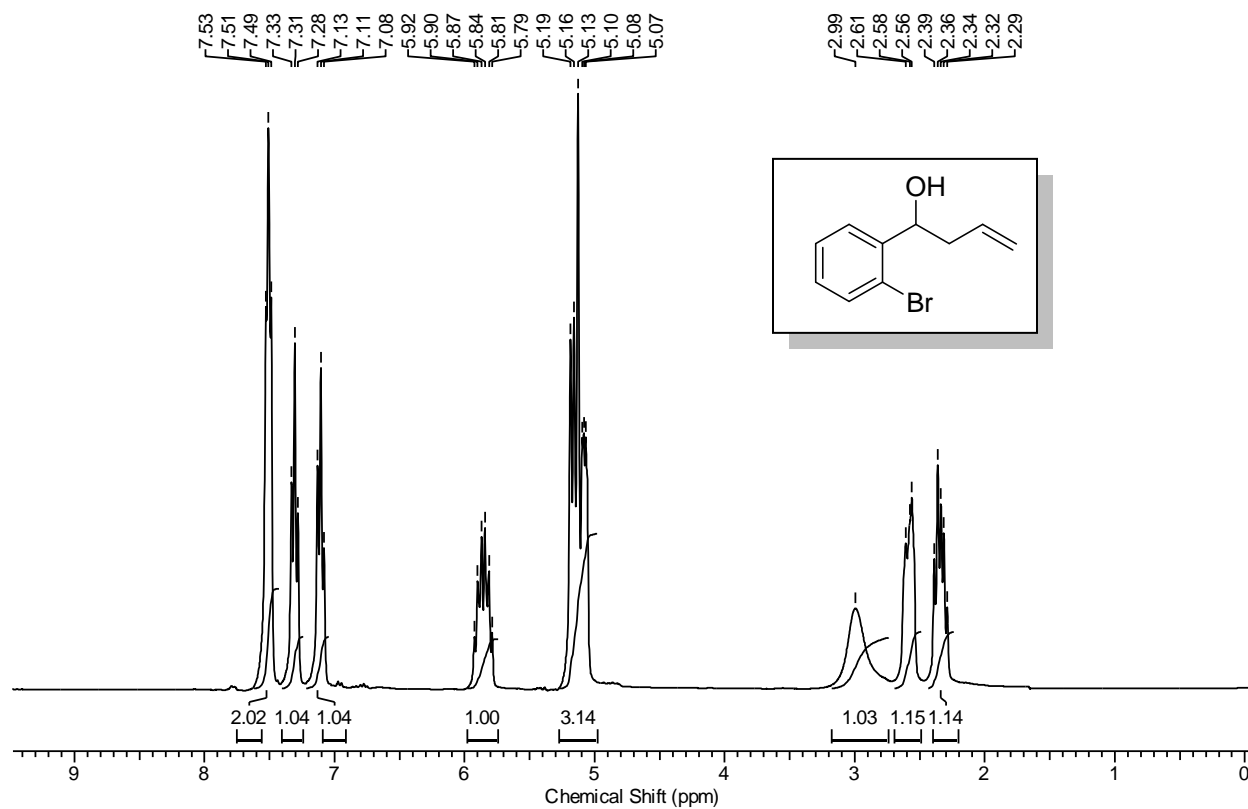

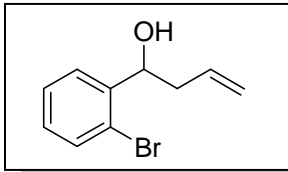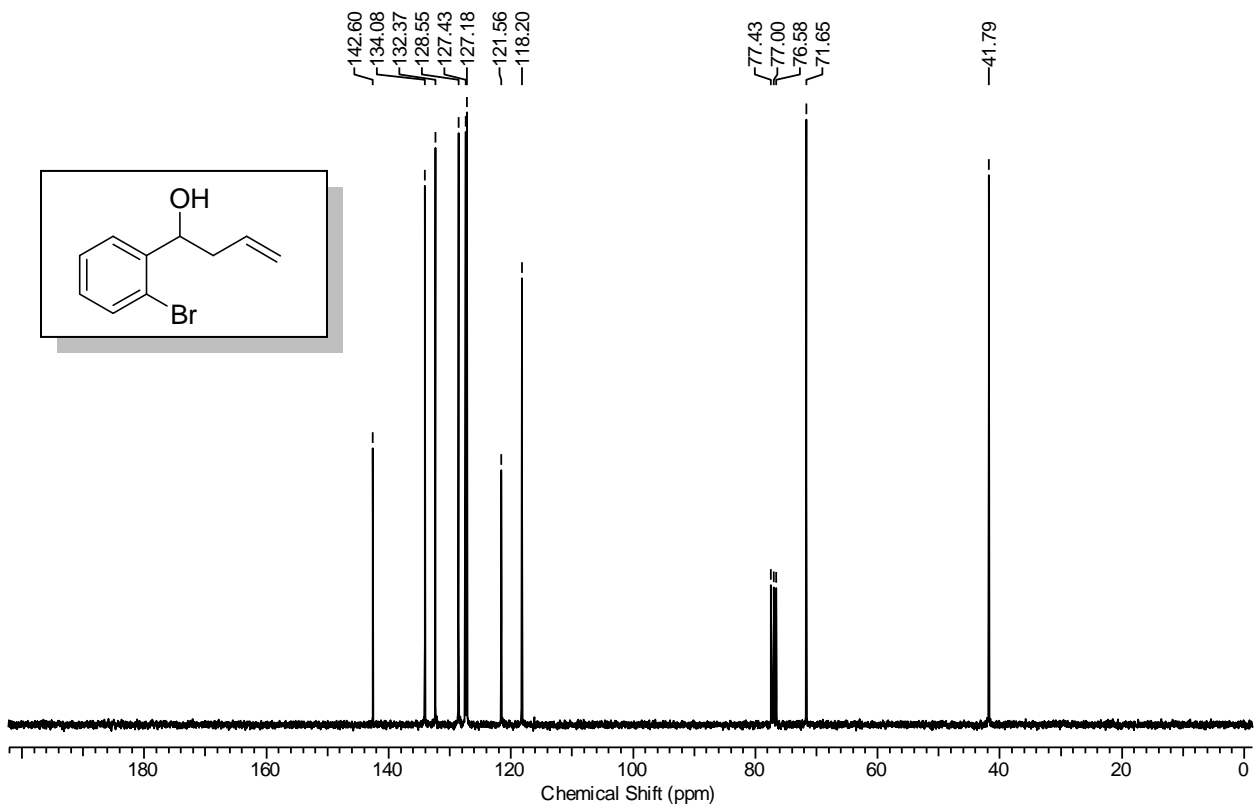

# 1-(Naphthalen-2-yl)but-3-en-1-ol (3p)

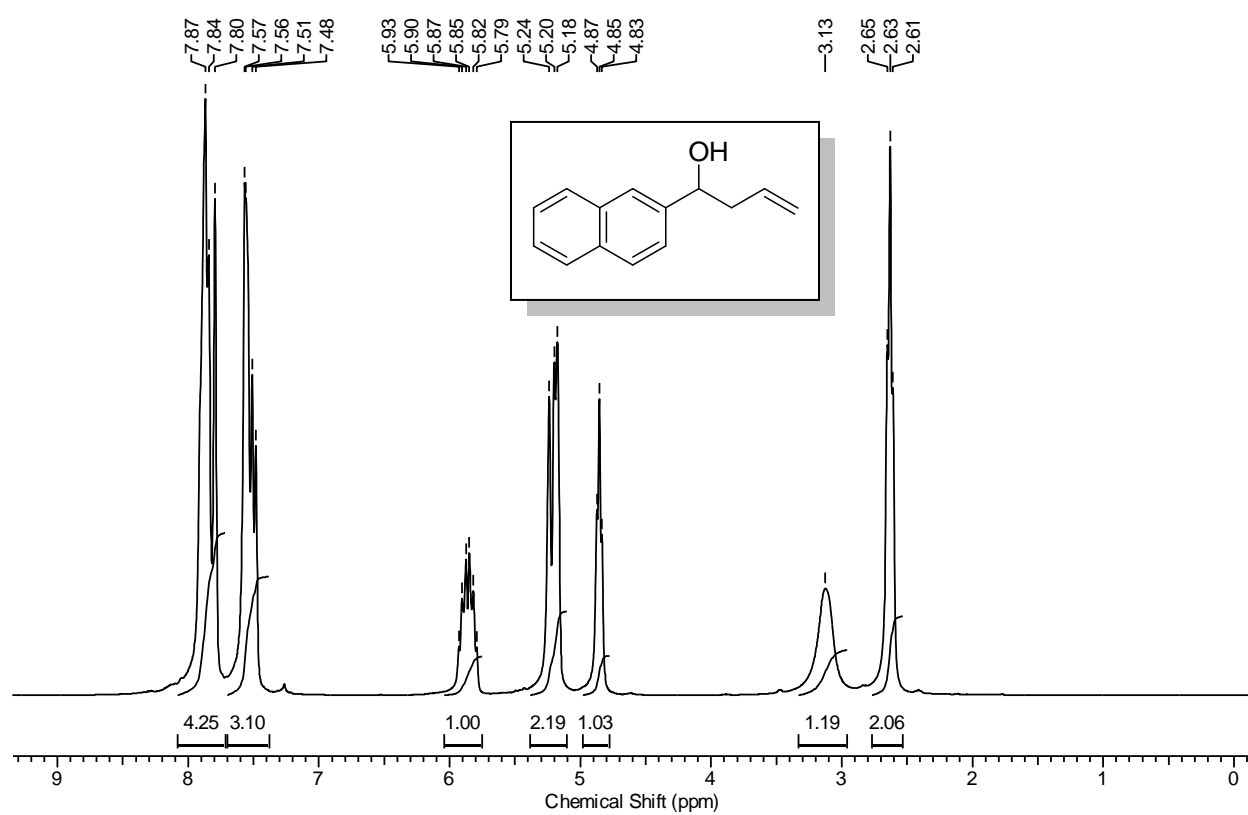



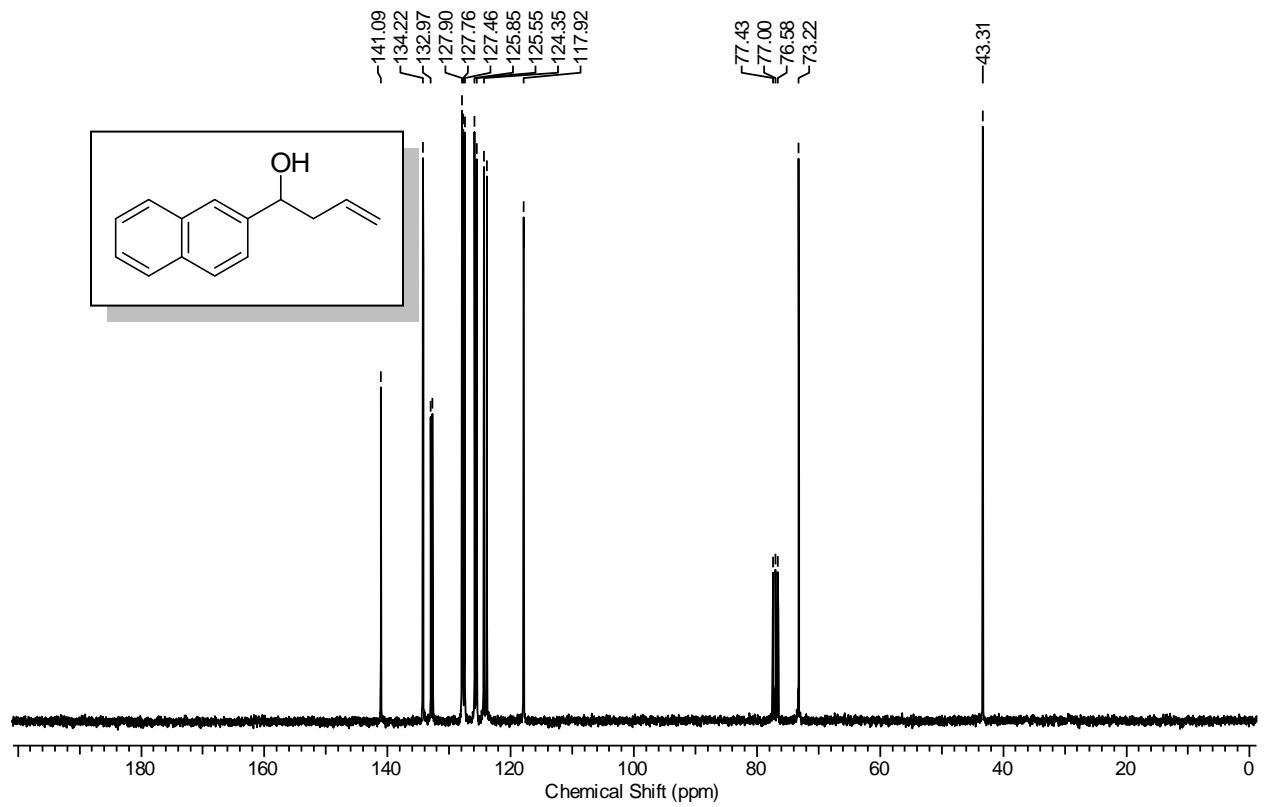

# Undec-1-en-4-ol (3q)

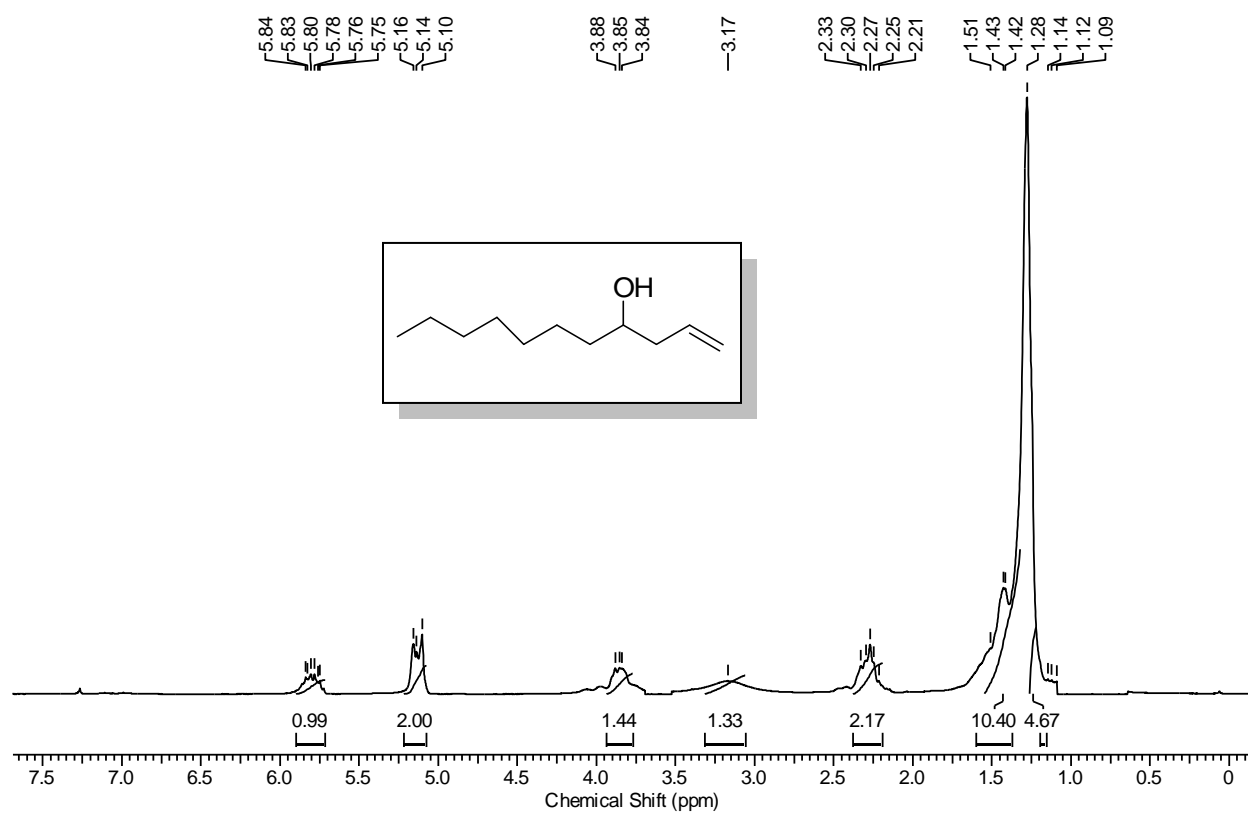

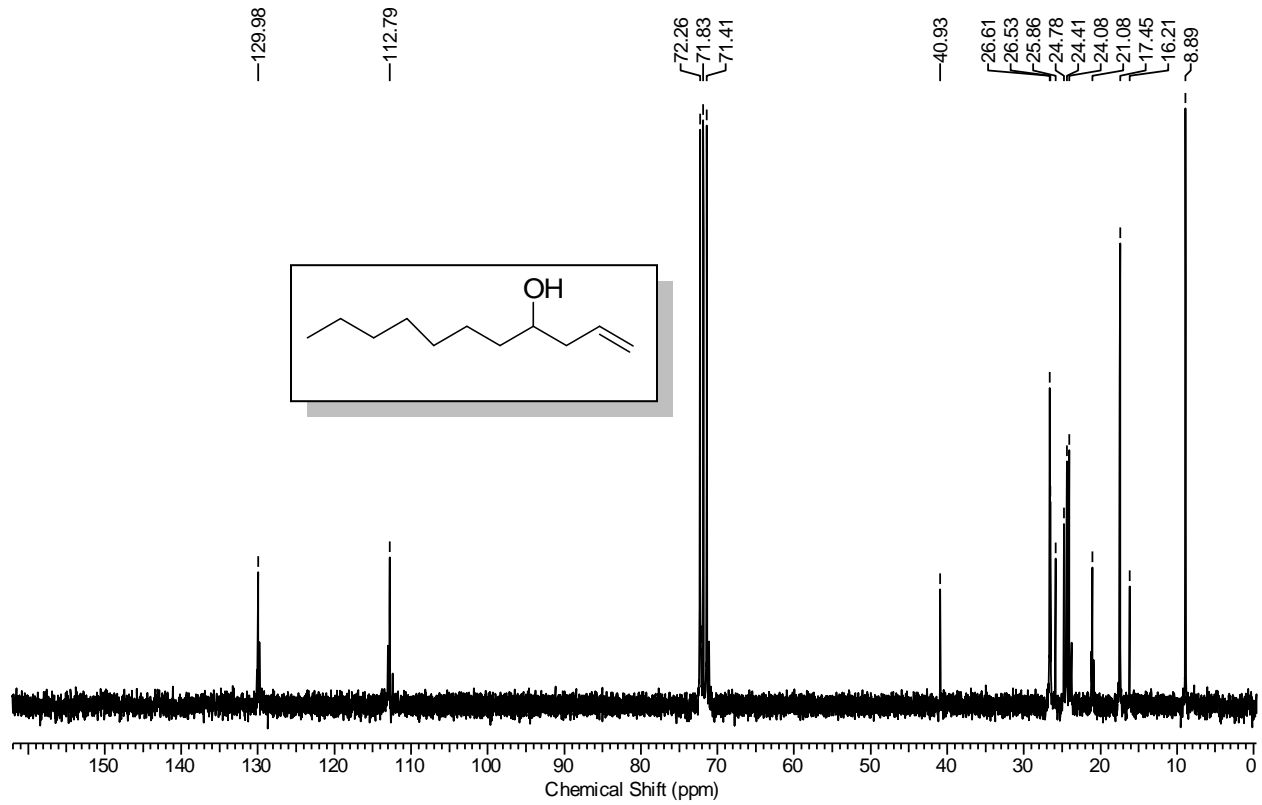

# 1-Phenylhex-5-en-3-ol (3r)

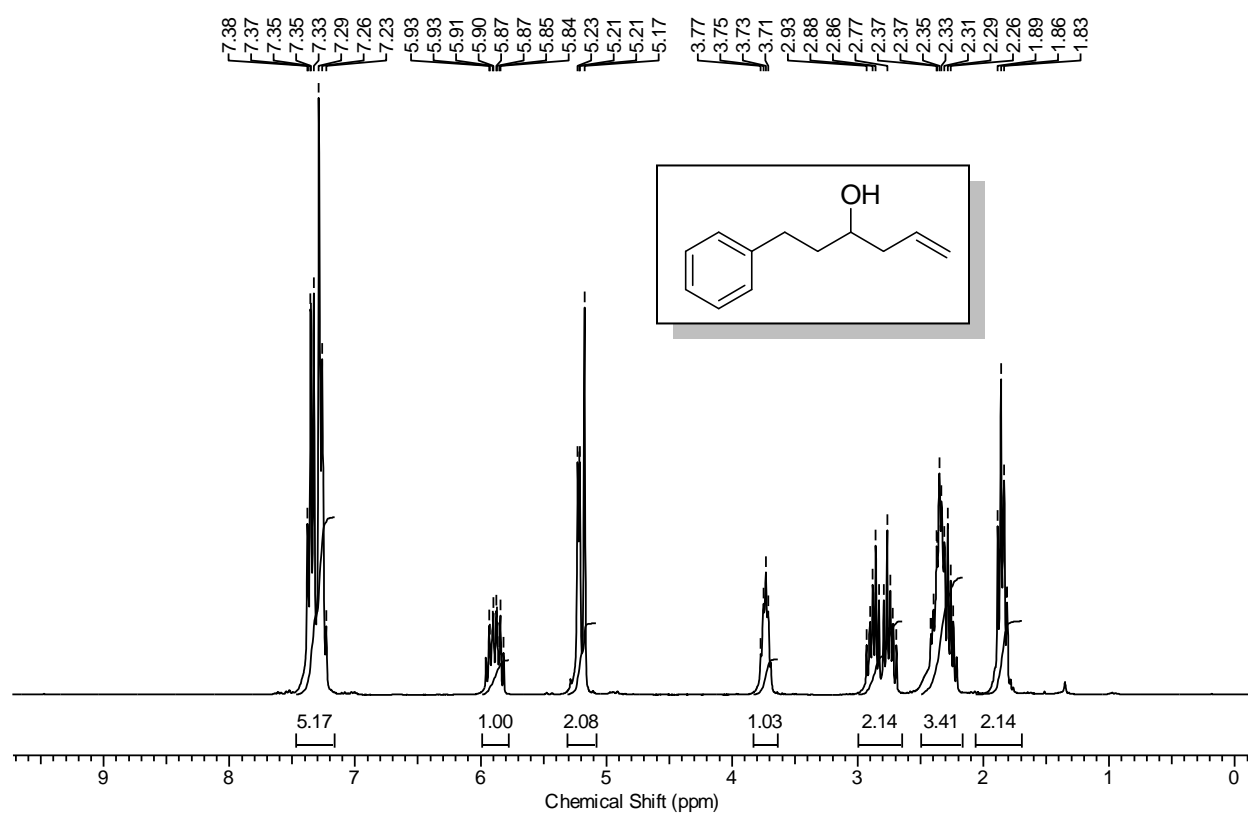

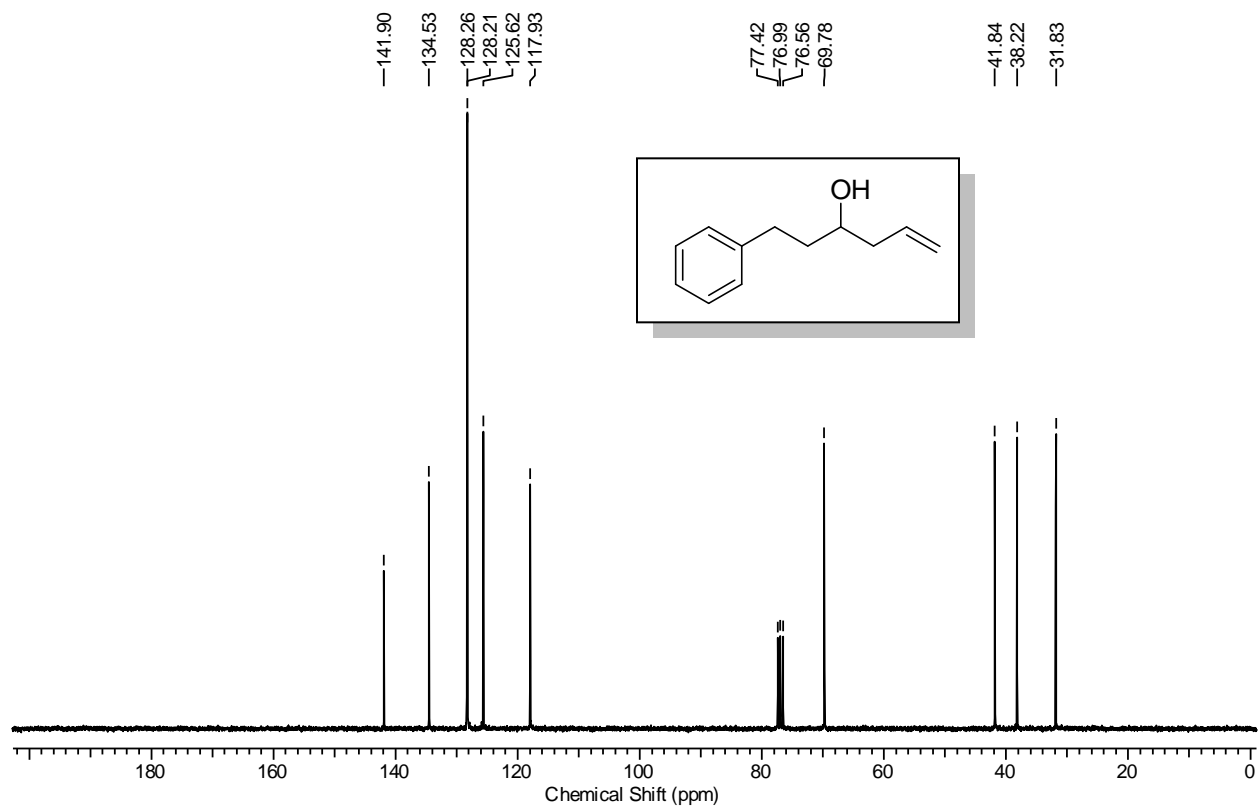

# 1-Phenyl-hexa-1,5-dien-3-ol (3s)

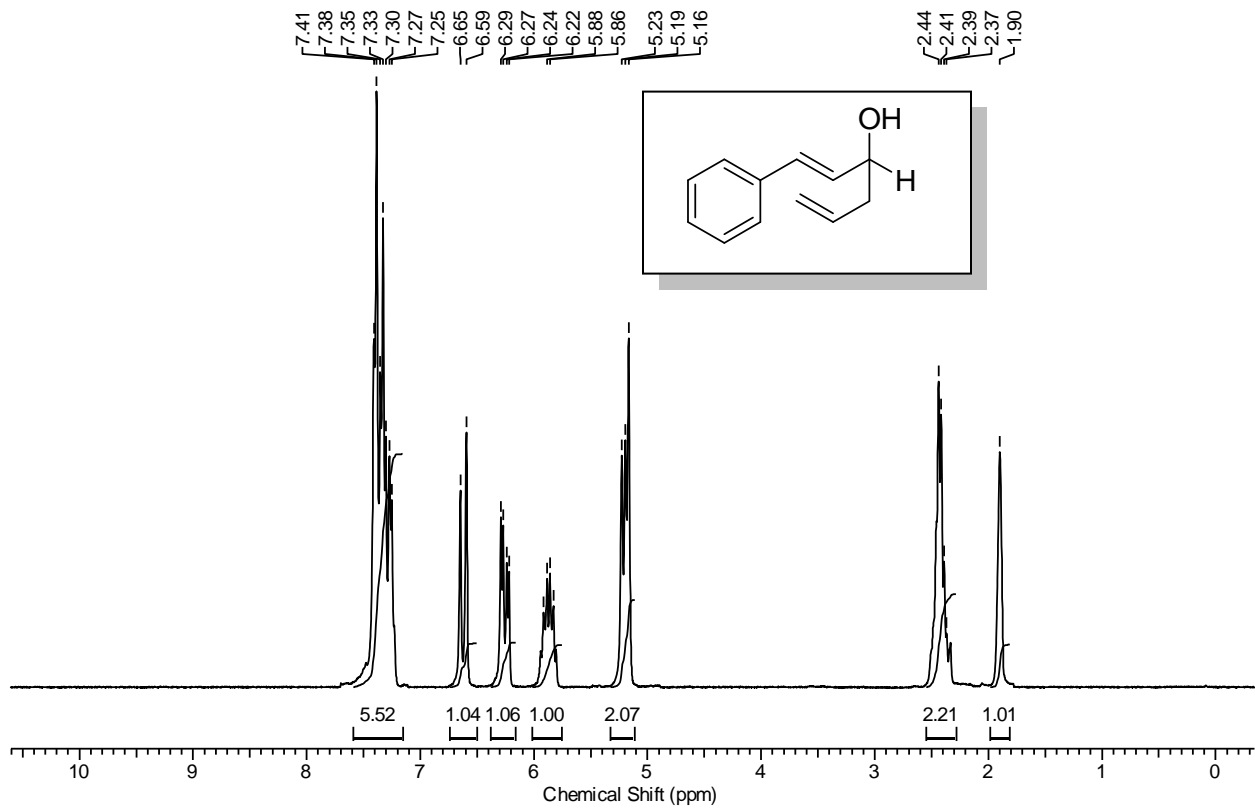

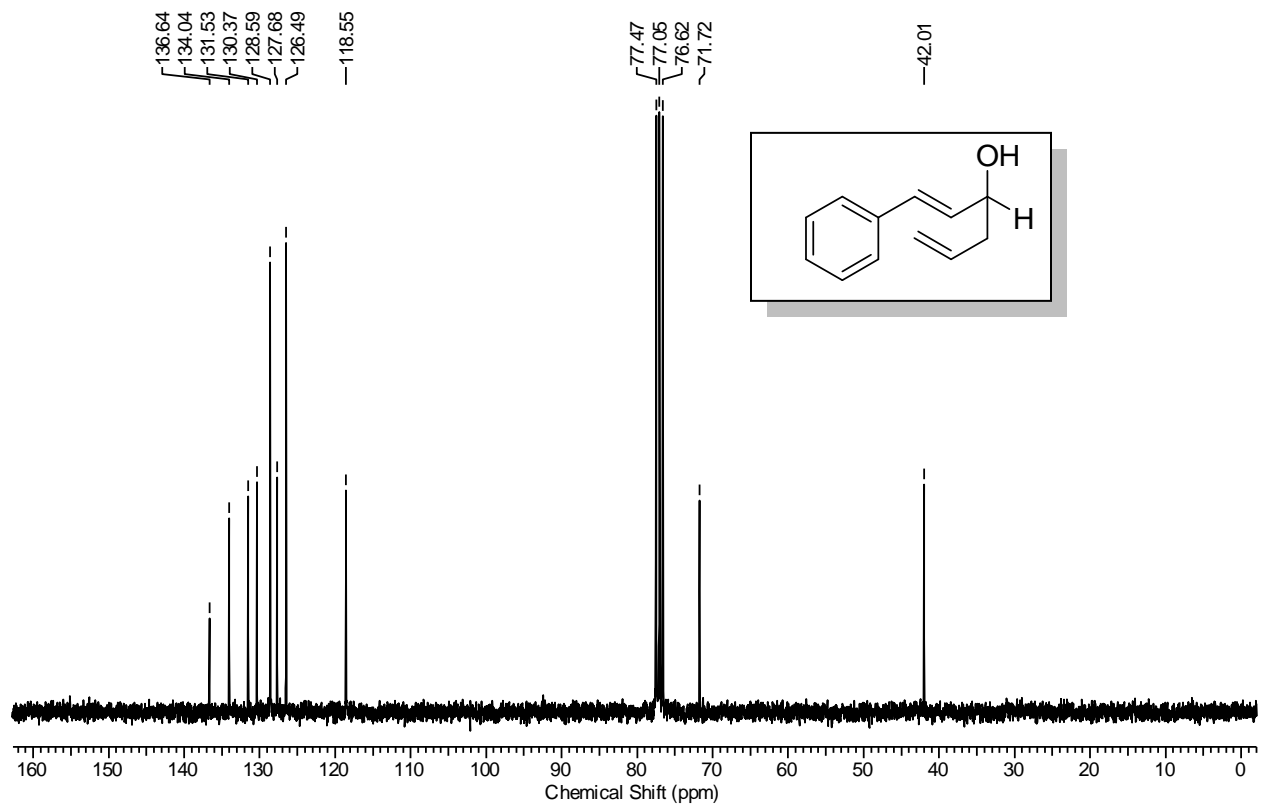

# 1-phenyl-1-methylbut-3-en-1-ol (5a)

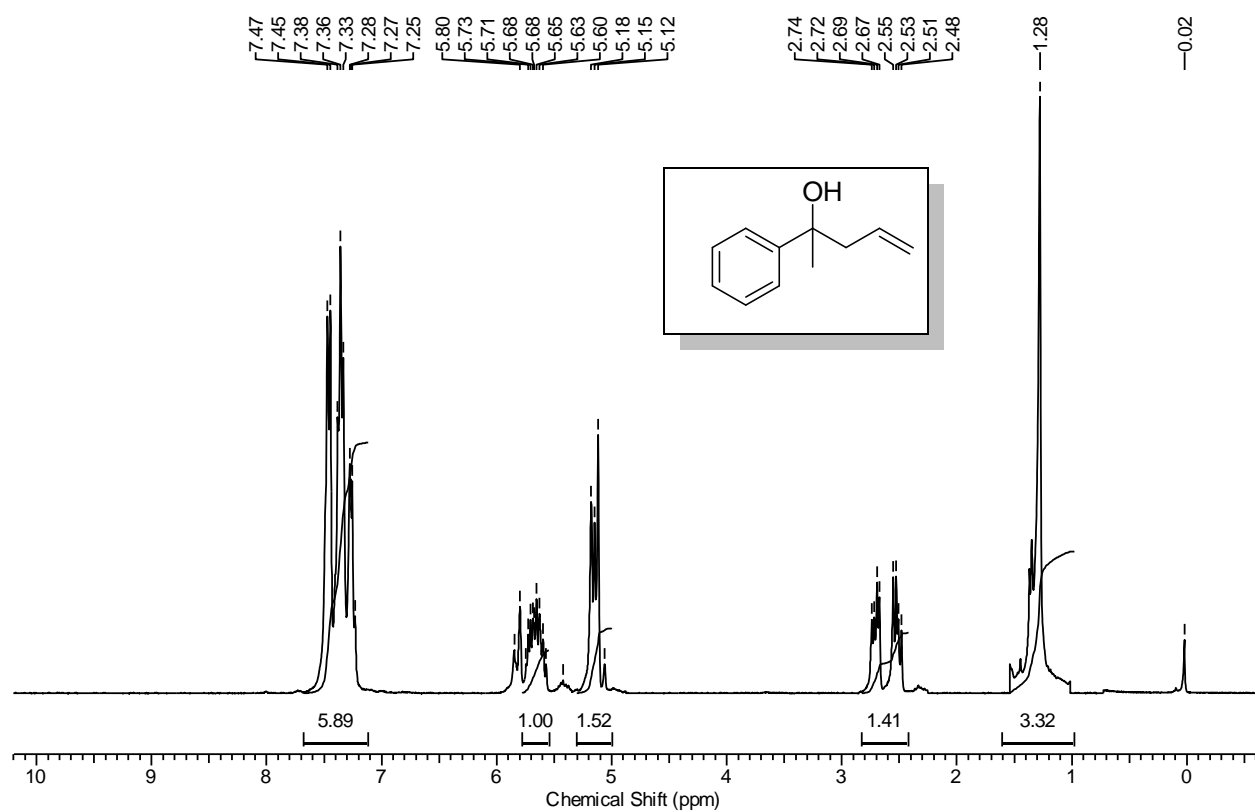



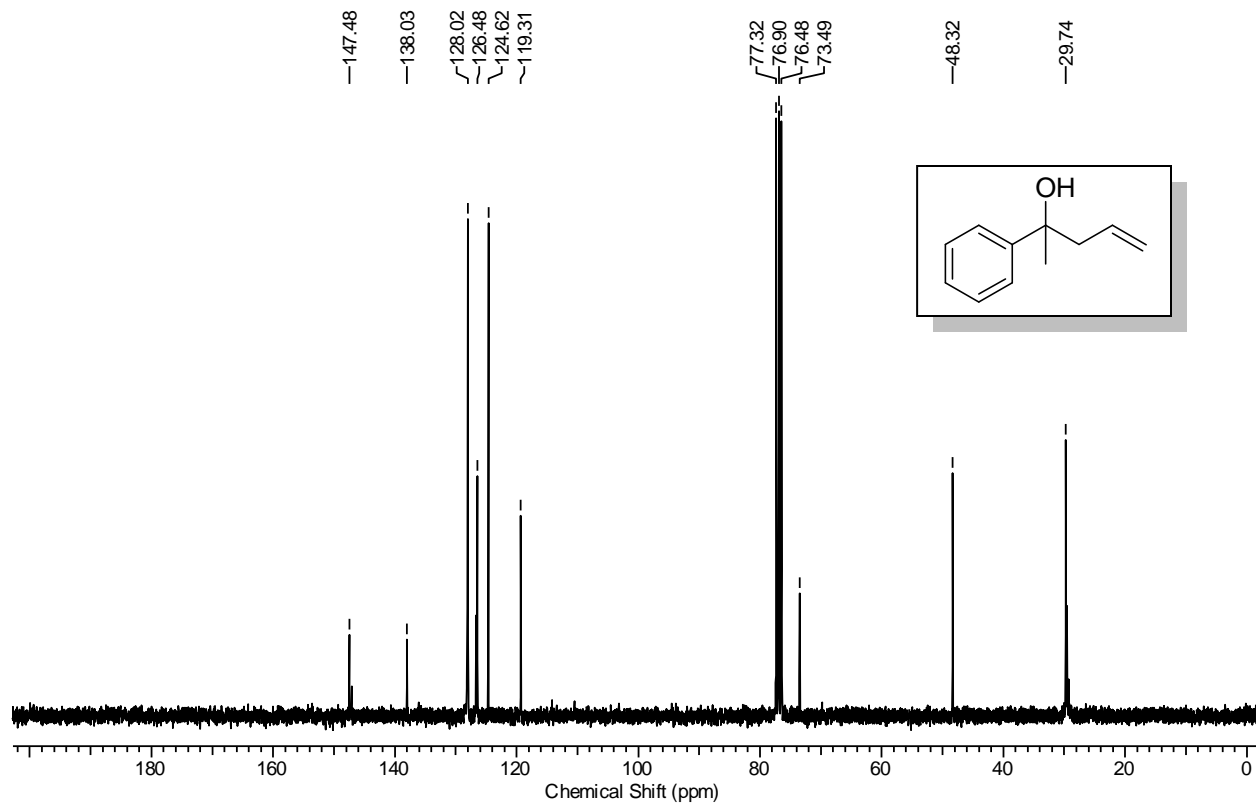

# 1-(o-Hydroxyphenyl)-1-methylbut-3-en-ol (5b)

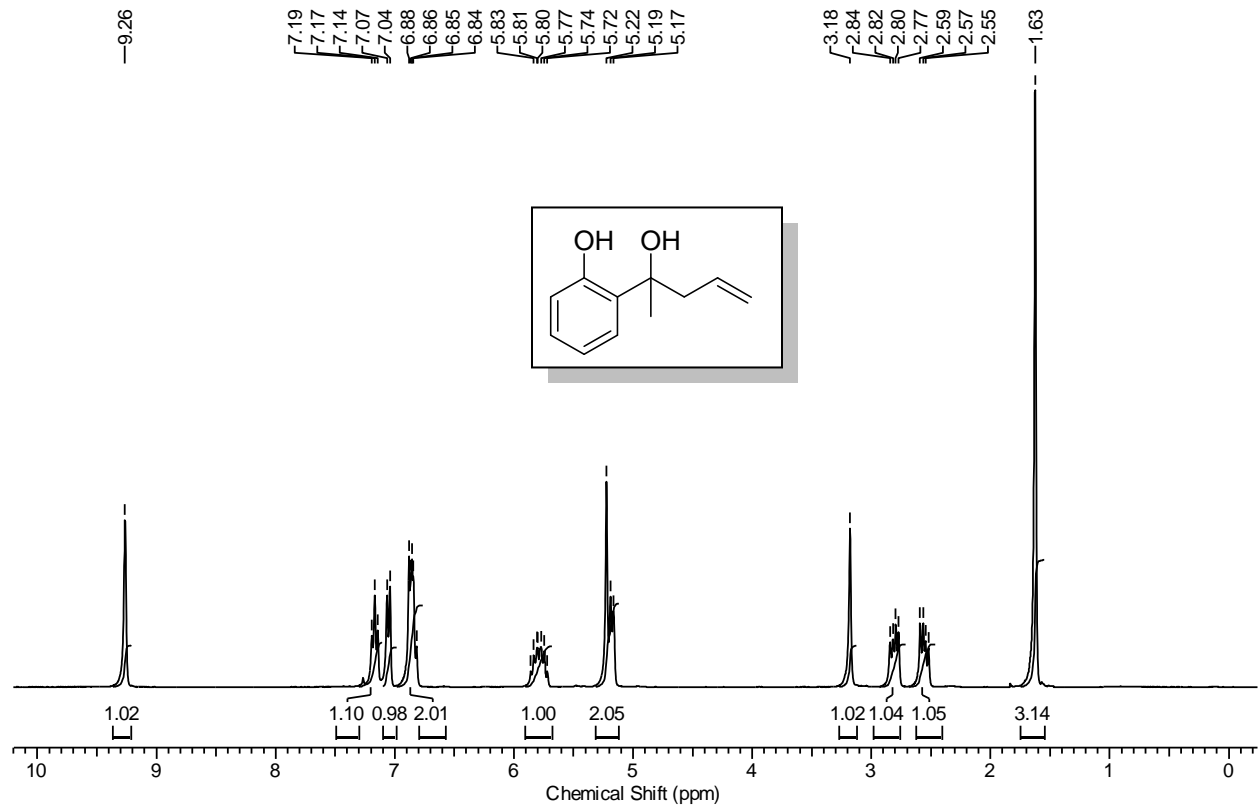

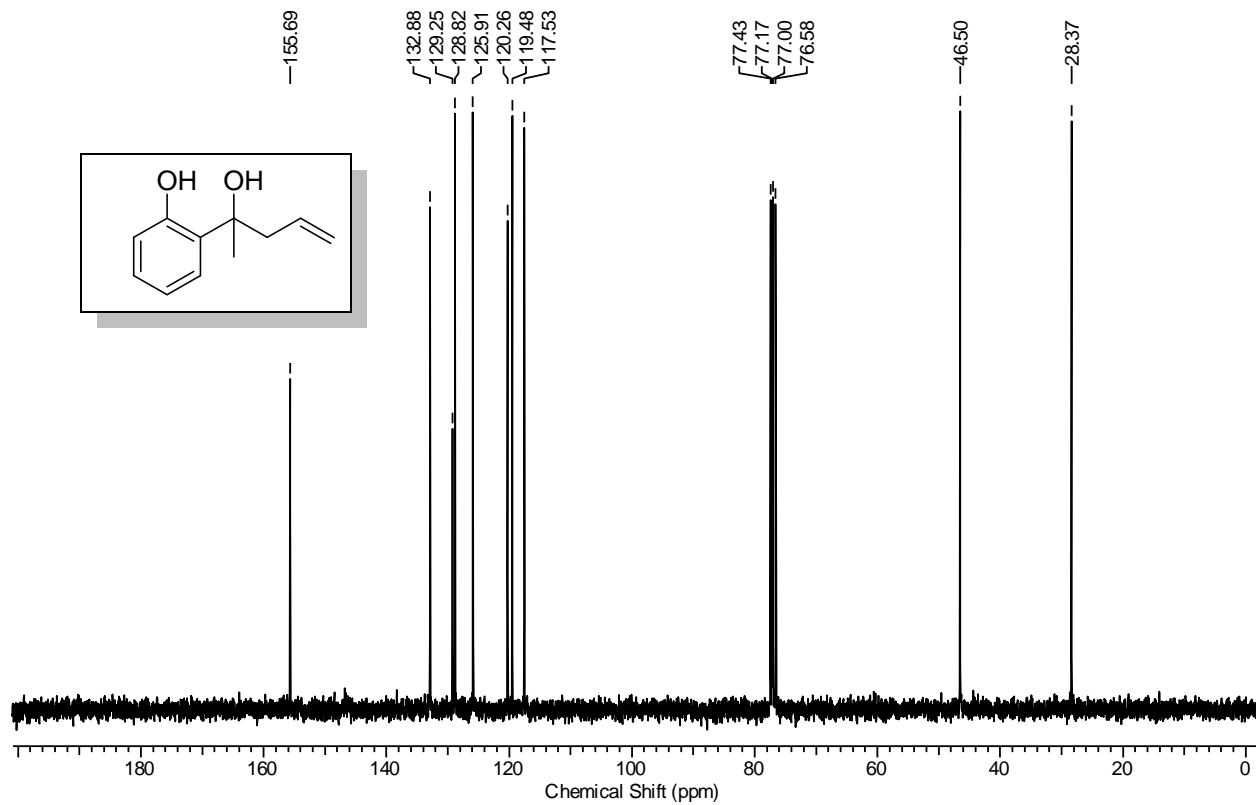

# 1-(p-Methylphenyl)-1-methylbut-3-en-1-ol (5c)

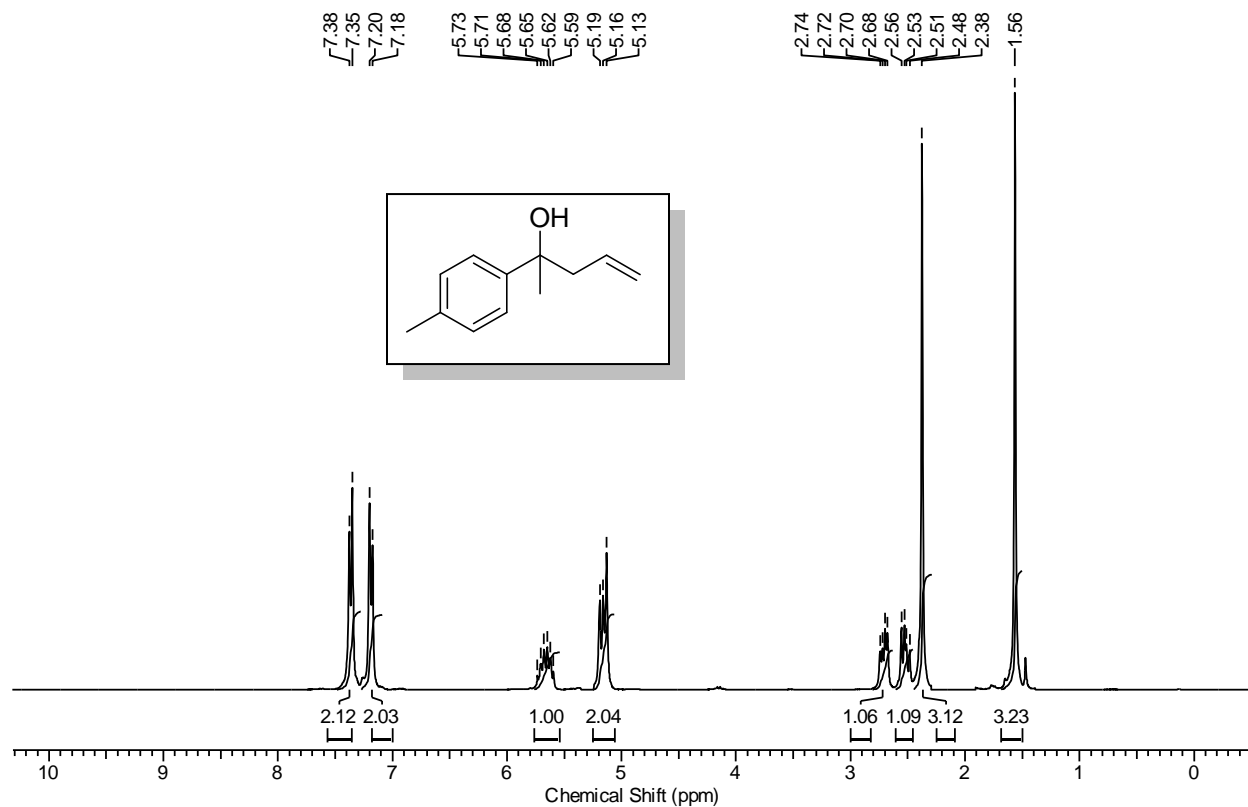

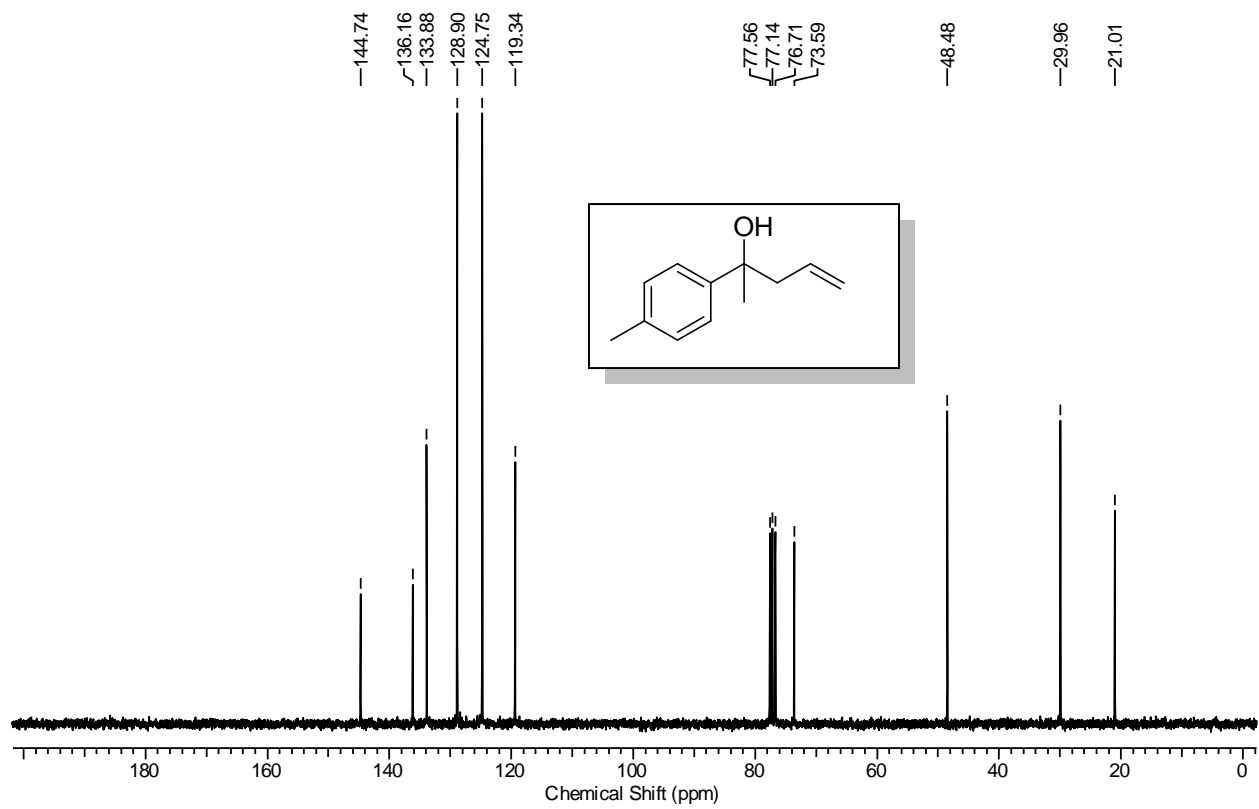

# 1-(p-Fluorophenyl)-1-methylbut-3-en-ol (5d)

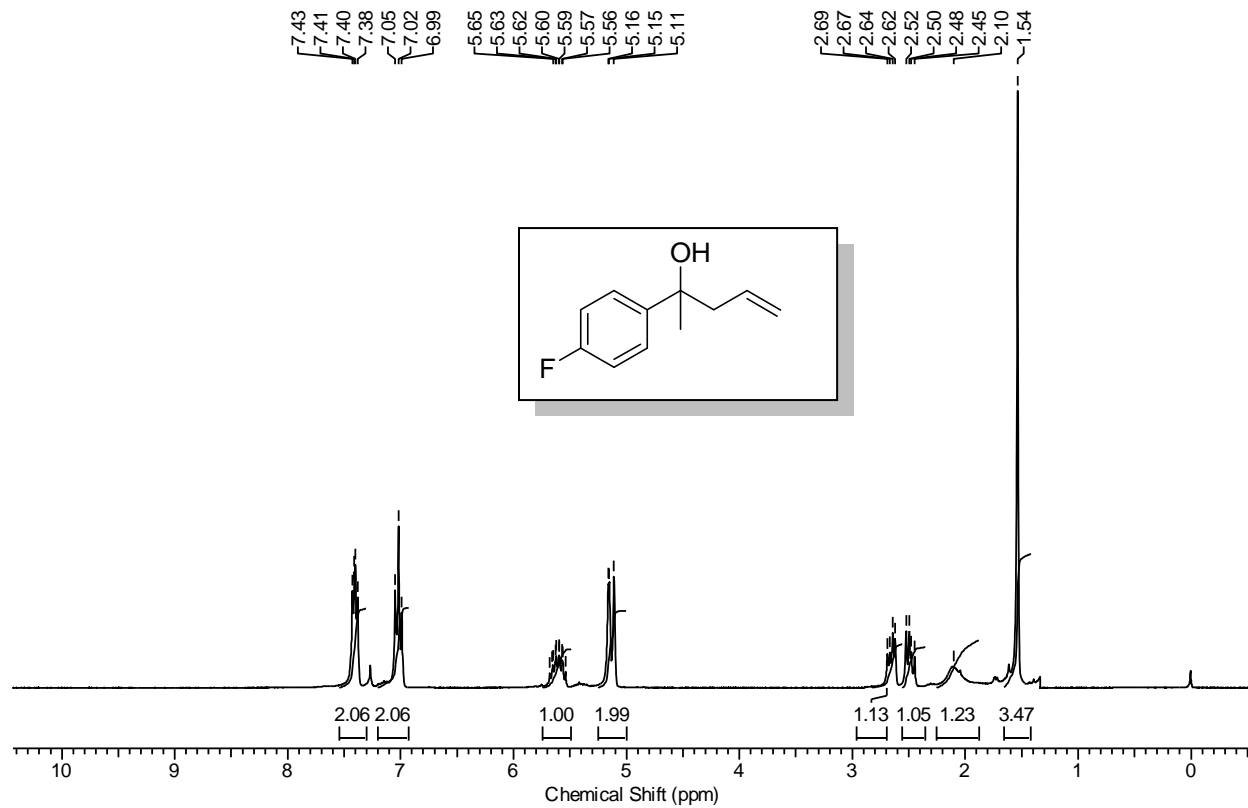

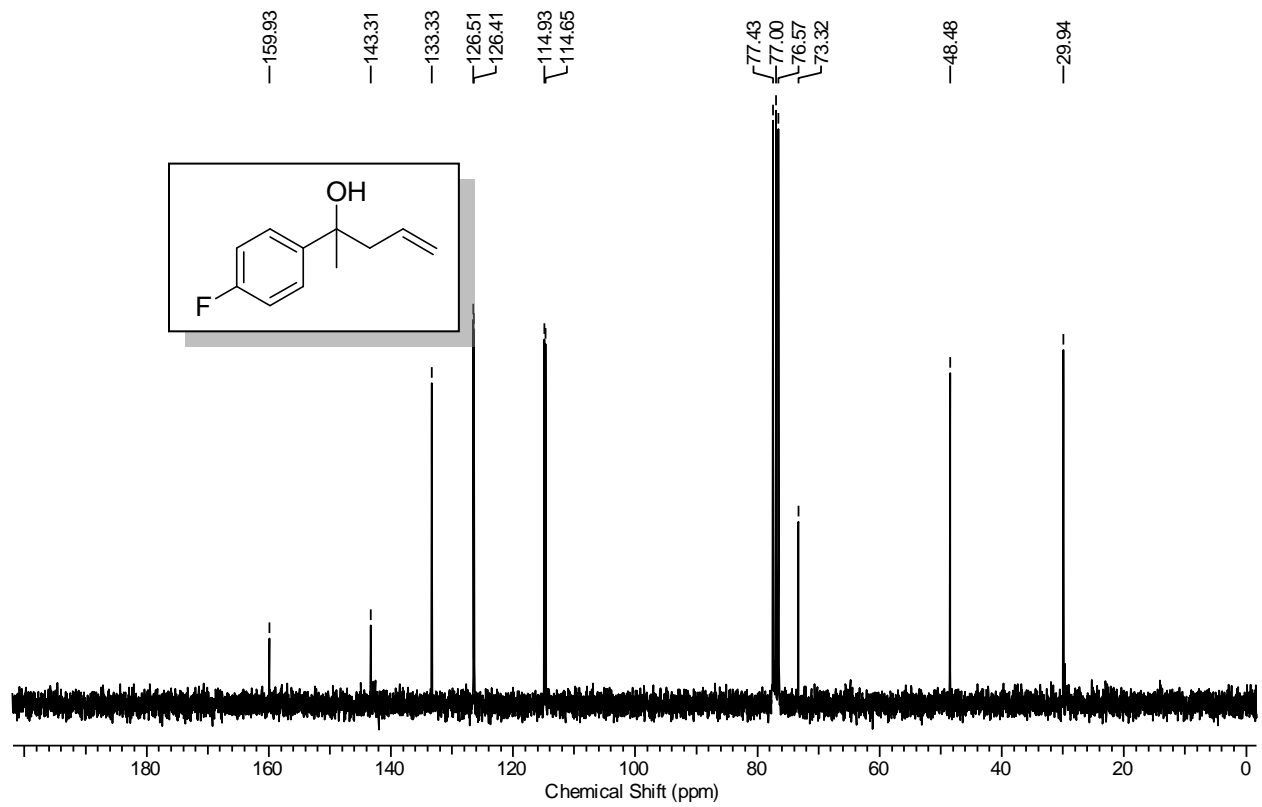

# 1-Cyclohexylbut-3-en-1-ol (5e)

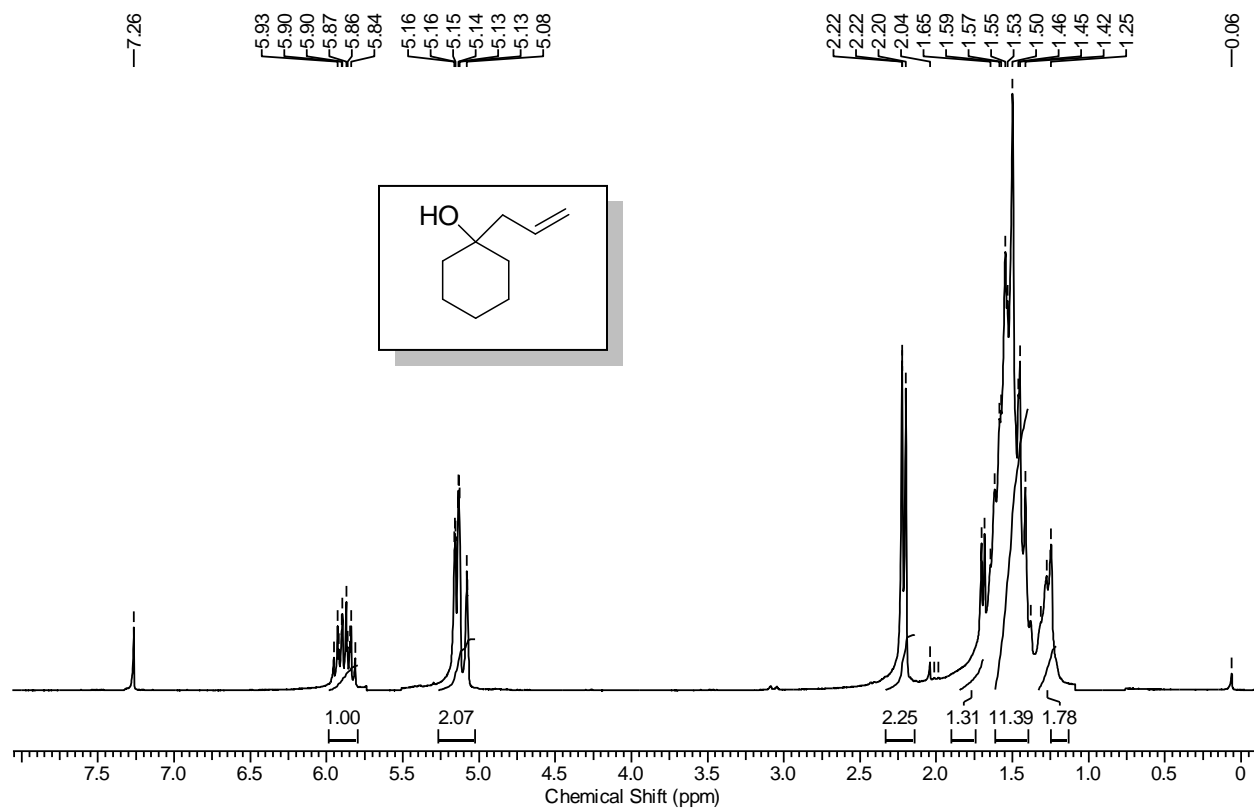



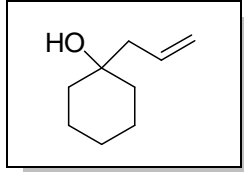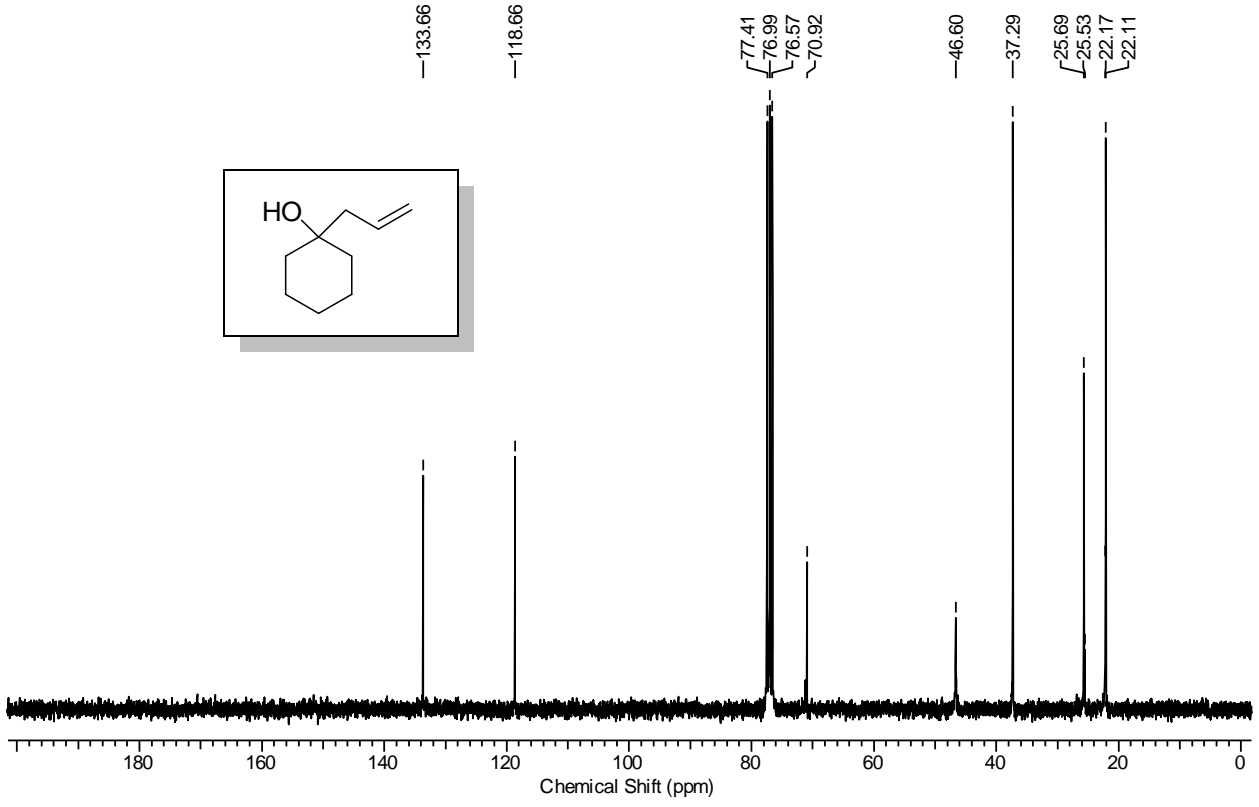

# 1-Cycloheptylbut-3-en-1-ol (5f)

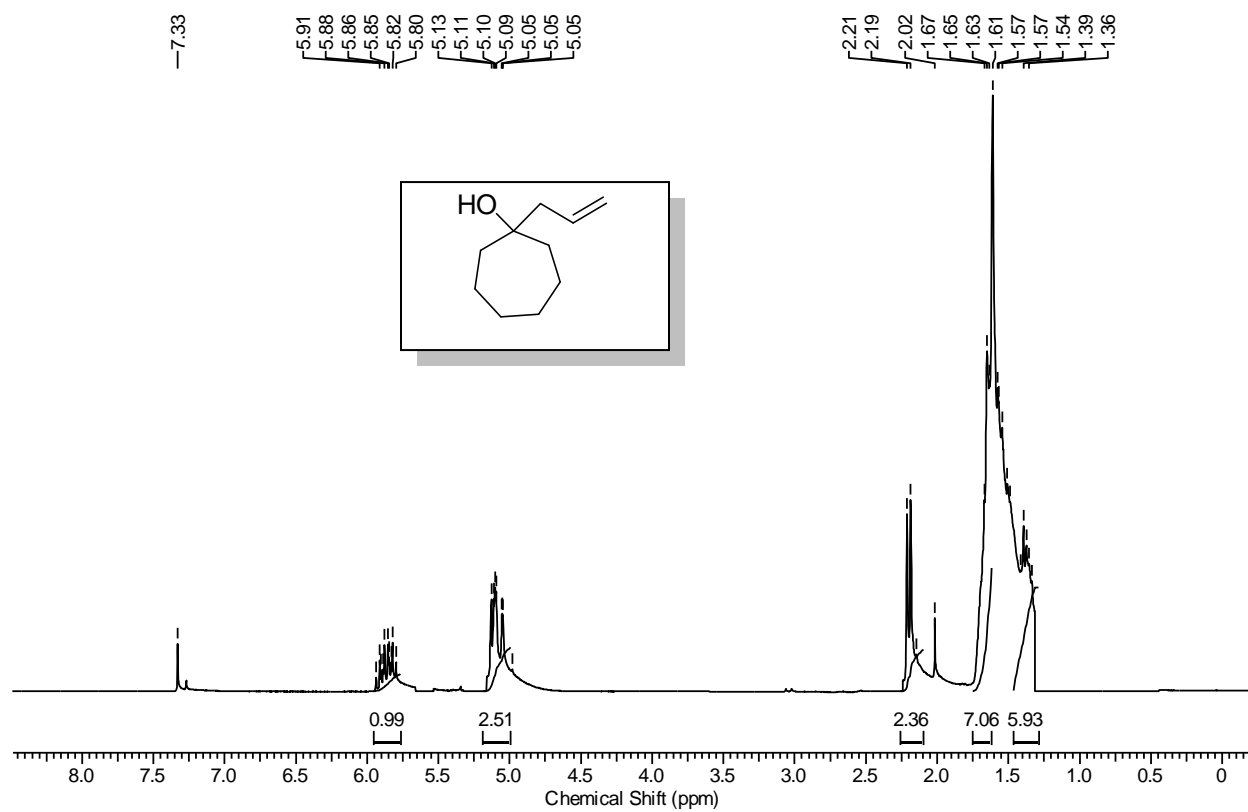

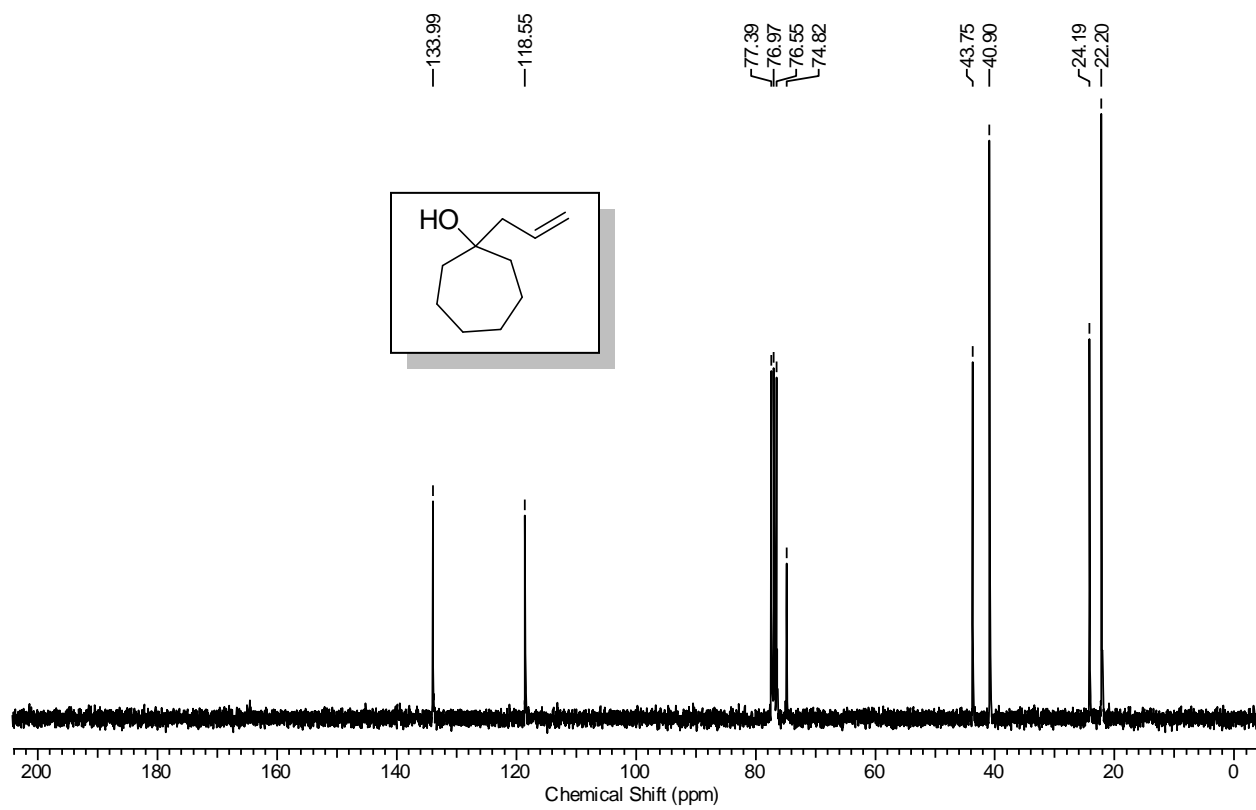

# 1-Cyclopentylbut-3-en-1-ol (5g)

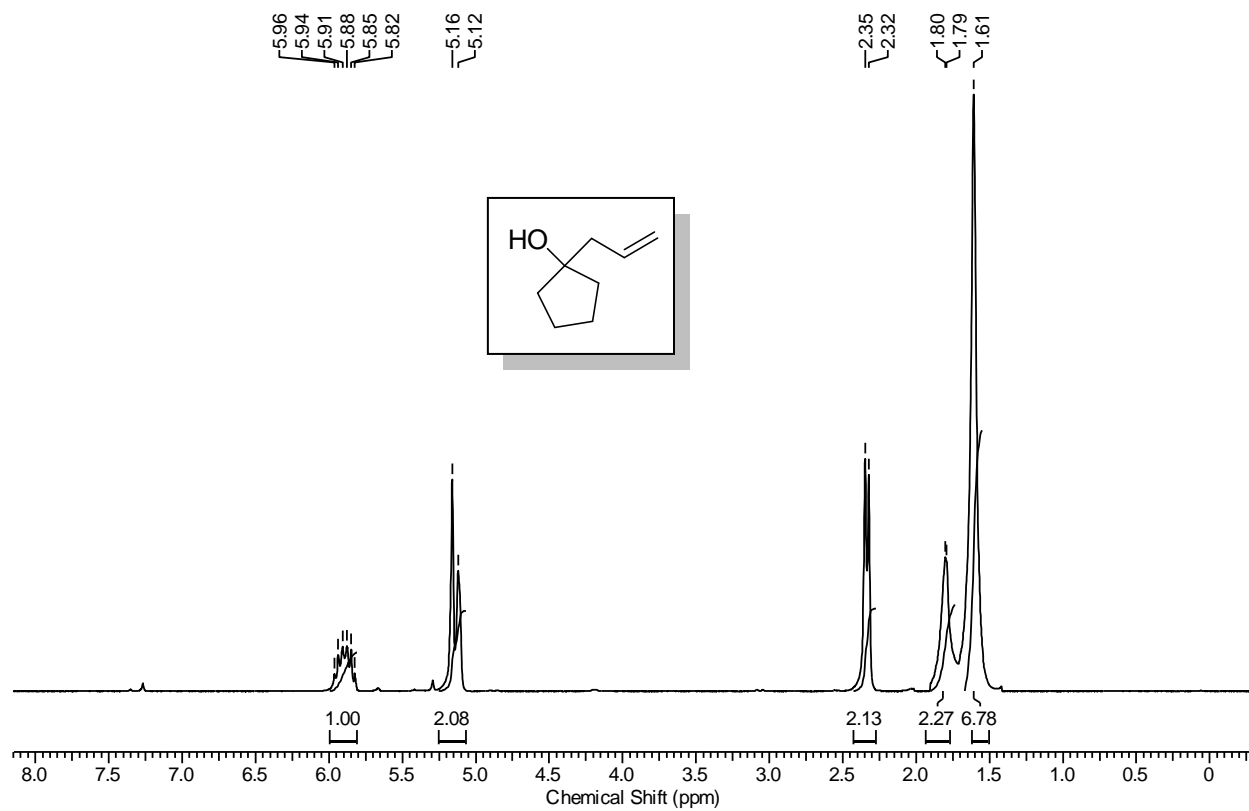

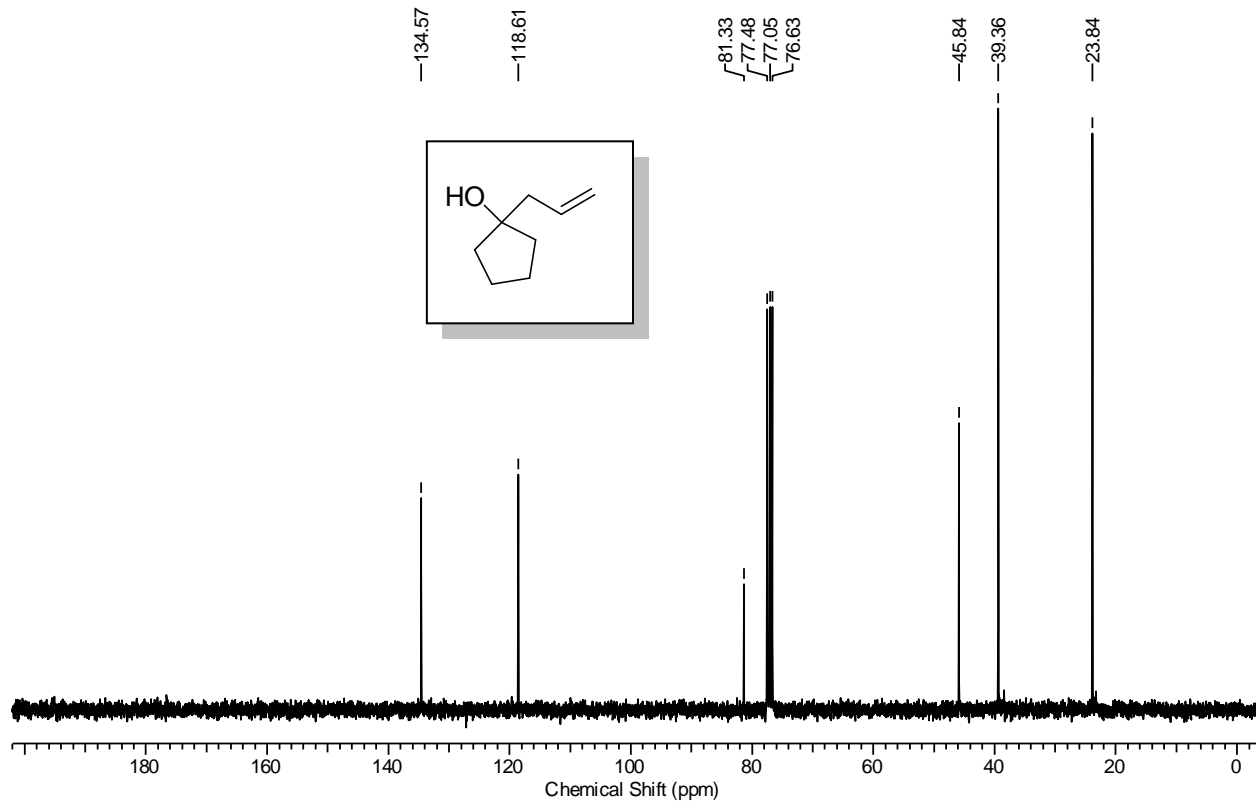

# 1-(4-MethylCyclohexyl)but-3-en-1-ol (5h)

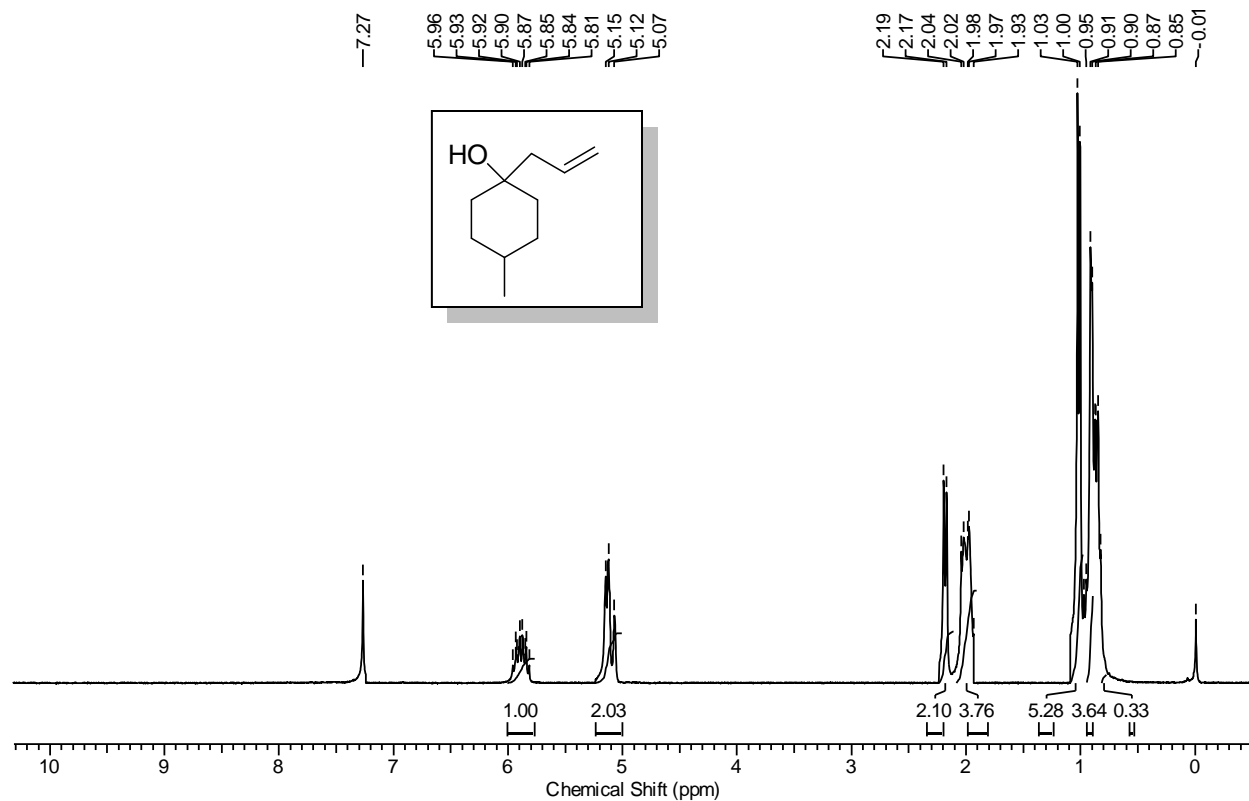

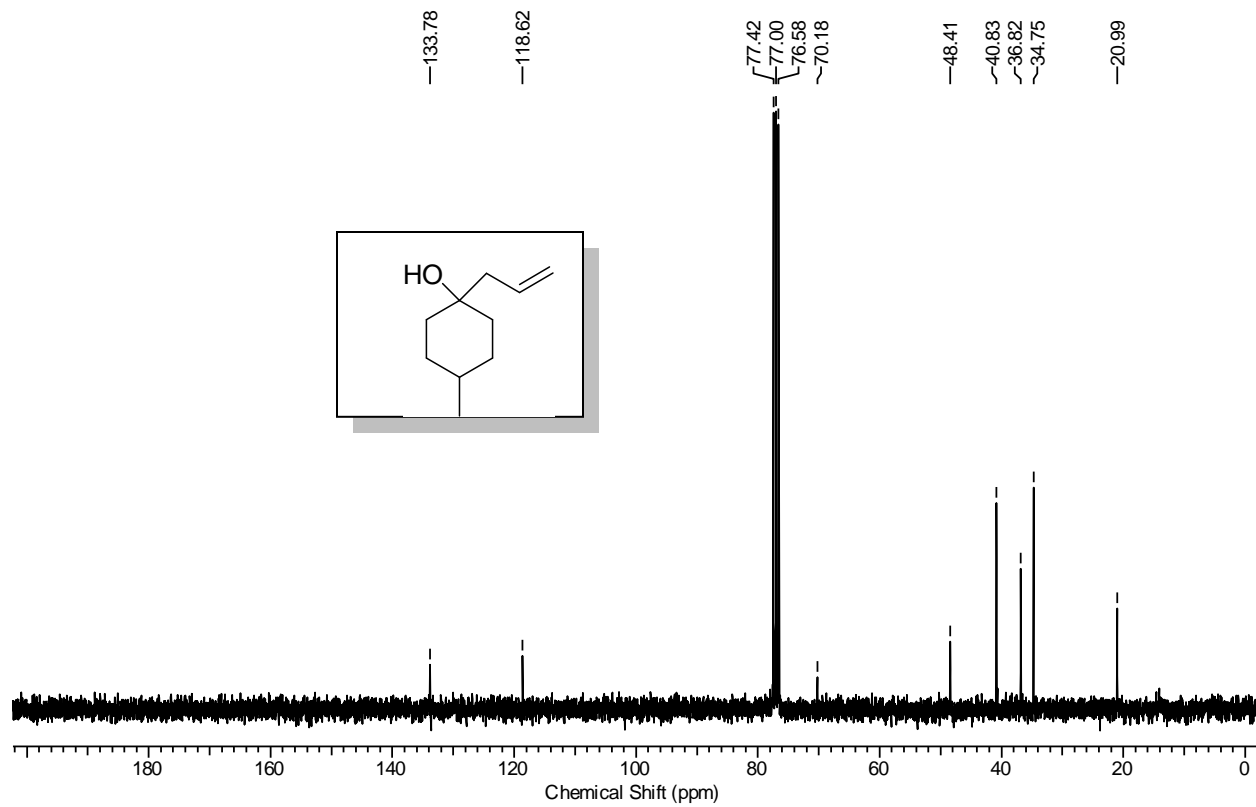

# 4-Methyl-hept-1-en-4-ol (5i)

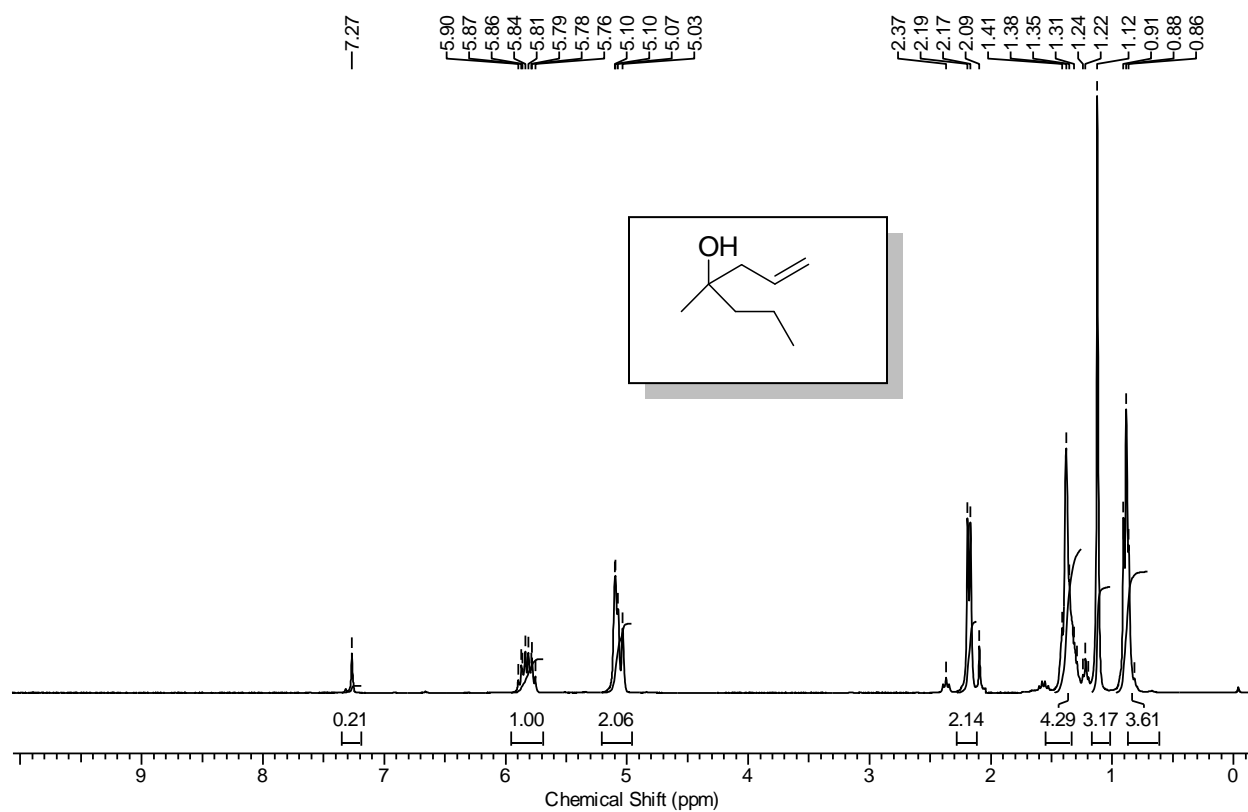



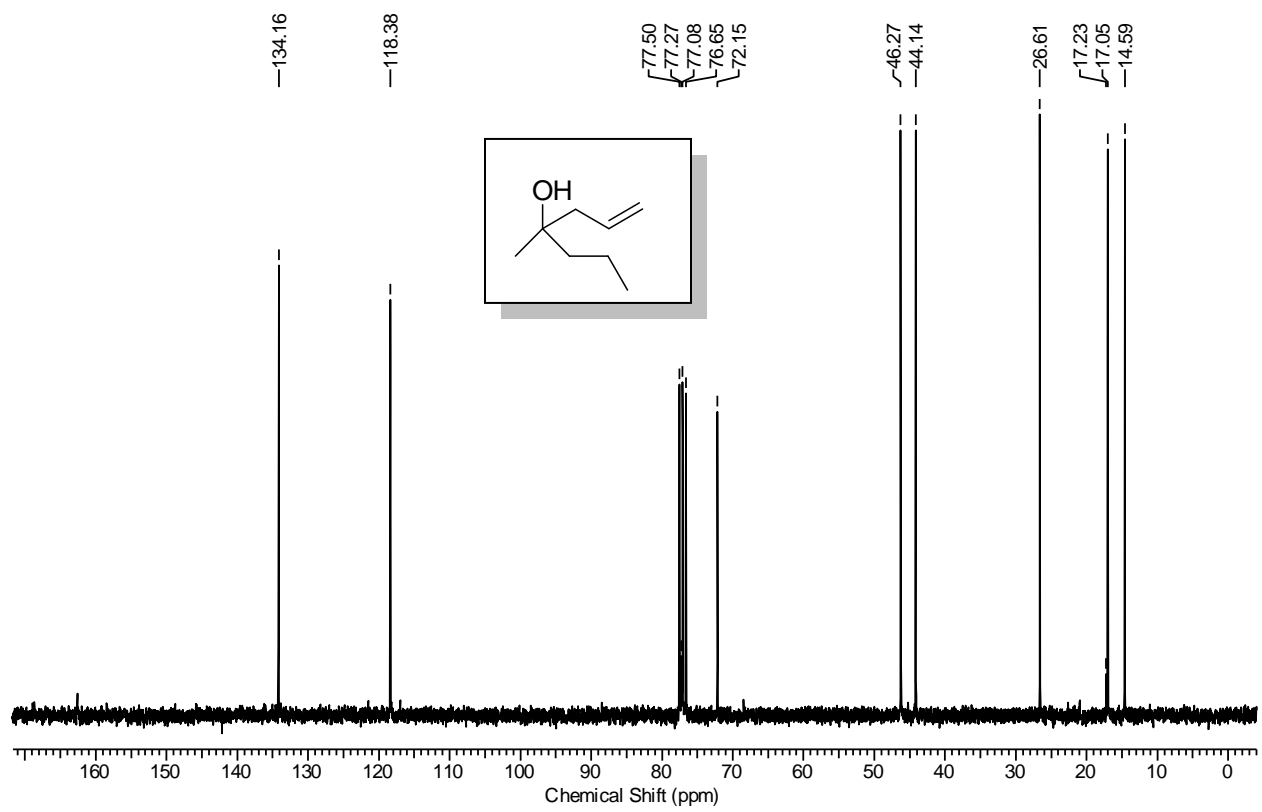

### 4-Methyl-oct-1-en-4-ol (5j)

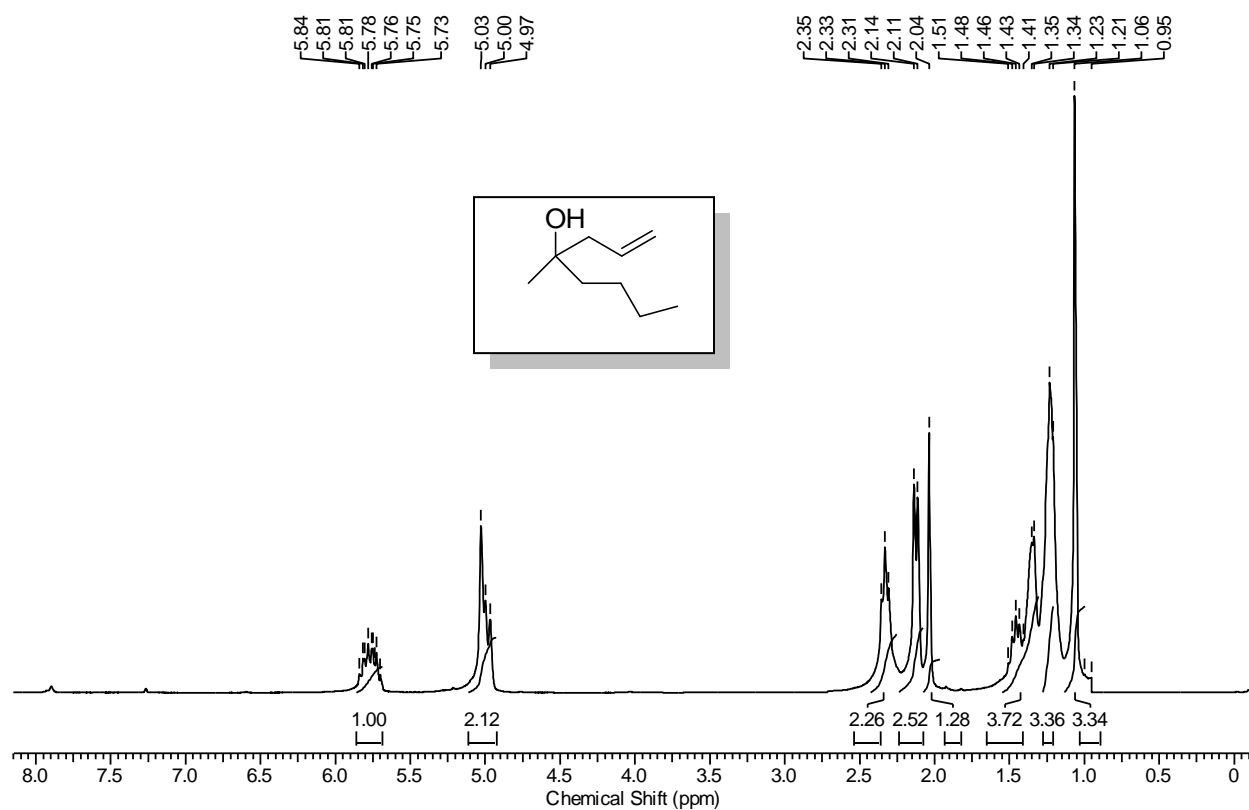

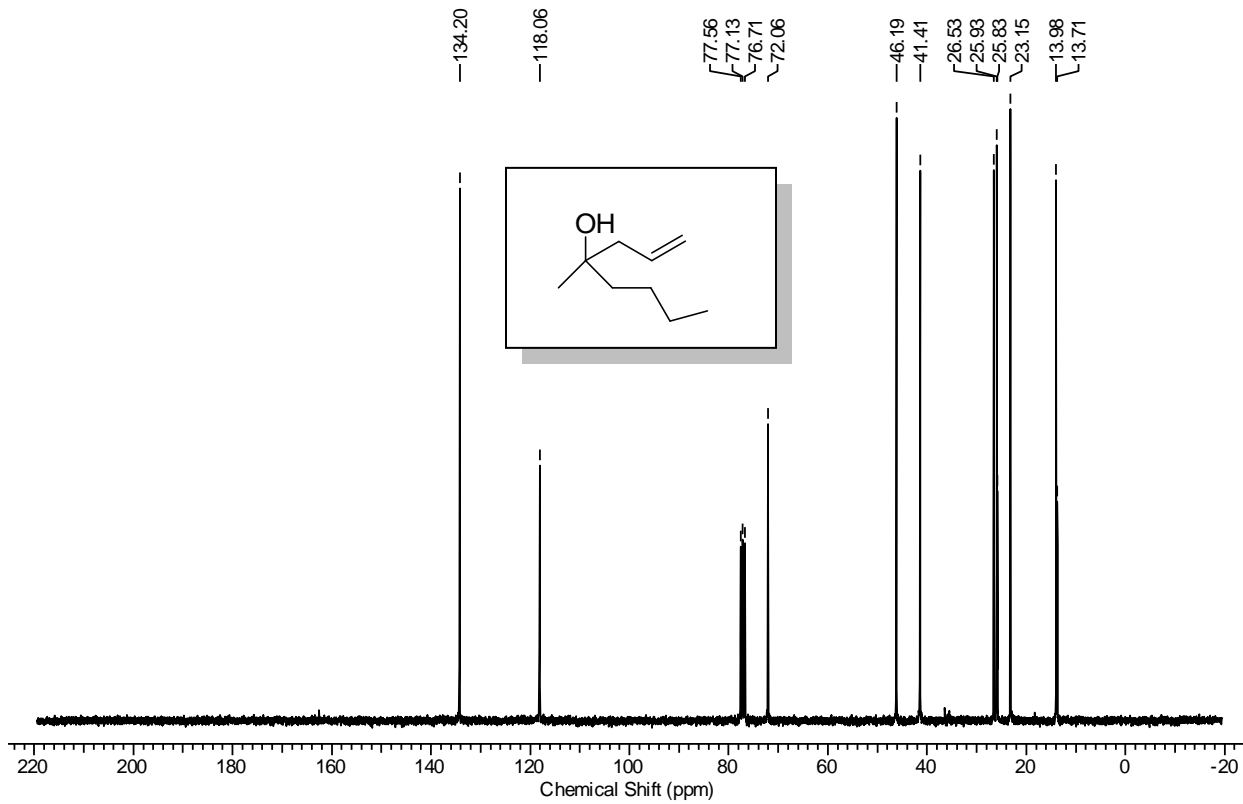

Supplement: mmc1 [file mmc1.pdf]
